# Supplementary material
Source: Research Square preprint supplement (doi:10.21203/rs.3.rs-9187684/v1)
Supplement: Supplementary file 1 [file 2f974db3a4603801713d3c76.docx]

**Supplementary Information**

[1. Supplementary Methods 3](#_heading=h.e9xegd2m5f8f)

[1.1 Rationale for 35-Minute Completion Time Threshold 3](#_heading=h.xfogrb8nv65r)

[1.2 Application of Exclusion Criteria 4](#_heading=h.ku1utrh2ugm5)

[1.3 Question Development Protocols 4](#_heading=h.vtx4zwx3wls7)

[1.3.1 Common Elements Across Both Protocols 4](#_heading=h.5zd75vmu08u7)

[1.3.2 AI-Gen Protocol 5](#_heading=h.3s9vseodcvo)

[1.3.2.1 General Principles 5](#_heading=h.m4b8mgnsorey)

[1.3.2.2 Step 1: Initial Question Generation Using ChatGPT-4 5](#_heading=h.3owlqux5wyae)

[1.3.2.3 Step 2: Quality Review by Question Writer 7](#_heading=h.13wj5vej6yjb)

[1.3.2.4 Step 3A: Cross-Verification Using Google Gemini v1.5 Flash 7](#_heading=h.j23a42v5rp4z)

[1.3.2.5 Step 3B: Confidence Verification 7](#_heading=h.3udveejamjmq)

[1.3.2.6 Step 4: Decision Point and Documentation 8](#_heading=h.uddqajw1i4vv)

[1.3.3 Human-Gen Protocol 8](#_heading=h.6zmvvlc5209o)

[1.3.3.1 General Principles 8](#_heading=h.1dxon9gzob0k)

[1.3.3.2 Step 1: Question Development 8](#_heading=h.6j3wrqn8ghxg)

[1.3.3.3 Step 2: Peer Review Process 9](#_heading=h.ylahltanvzoc)

[1.3.3.4 Step 3: Time Documentation 9](#_heading=h.fforzdc9zogu)

[1.4 Content Validity and Curriculum Alignment 9](#_heading=h.kkn8tjdxiqxc)

[1.5 Statistical Analysis 10](#_heading=h.6itrhte3zoeh)

[1.5.1 General analytic approach 10](#_heading=h.hqbjz7ti4crh)

[1.5.2 Feasibility analysis 10](#_heading=h.t3d98g3v0rjc)

[1.5.3 Acceptability analysis 10](#_heading=h.yo79a1iturtz)

[1.5.4 Reliability analysis 10](#_heading=h.5a3649j4zi6u)

[1.5.5 Validity and subgroup analyses 11](#_heading=h.dhrmndae16ic)

[1.5.6 Educational impact 11](#_heading=h.1lt064w5giz5)

[1.6 Survey Instruments 12](#_heading=h.v8ca2oy5ah4b)

[1.6.1 Pre-Exam Survey 12](#_heading=h.tryxek11qdgx)

[1.6.1.1 Demographic and Academic Variables 12](#_heading=h.wh1mxkbdvfuy)

[1.6.1.2 Self-Efficacy and Learning Strategy Assessment 12](#_heading=h.fig37pjlg5pr)

[1.6.2 Post-Exam Survey 13](#_heading=h.fus8ewtwlseo)

[2. Supplementary Per-Protocol (PP) Results 13](#_heading=h.fu6hsq2n83lx)

[2.1 Acceptability Measures 14](#_heading=h.g32senhrcu06)

[2.2 Reliability Measures 14](#_heading=h.h52l3xnnn3ln)

[2.2.1 Item Discrimination (DI): 14](#_heading=h.r45hu4fpahi0)

[2.2.2 Distractor Efficiency (DE) 15](#_heading=h.gty10l7authd)

[2.3 Validity Measures 15](#_heading=h.4r8nn0o9pk91)

[2.3.1 Mean Exam Scores 15](#_heading=h.ysohr9u6e936)

[2.3.2 Subgroup Analysis: Performance by Undergraduate Academic Background 16](#_heading=h.e98cvix9pfql)

[2.3.3 Subgroup Analysis: Performance by Curricular Theme 17](#_heading=h.gzzk6six87is)

[2.3.4 Subgroup Analysis: Performance by Gender 17](#_heading=h.nv1uuipw4ei0)

[2.4 Educational impact 18](#_heading=h.45v10om5jd1h)

[3. Supplementary Intention-to-treat (ITT) Results 19](#_heading=h.mp813oxp6dmo)

[3.1 Subgroup Analysis: Performance by Undergraduate Academic Background 19](#_heading=h.gm7l7owxrfs7)

[3.2 Subgroup Analysis: Performance by Curricular Theme 19](#_heading=h.2x1mre6luzkc)

[3.3 Subgroup Analysis: Performance by Gender 20](#_heading=h.1ppl5r7e83f0)

[4. Supplementary Tables 21](#_heading=h.jy15nntjt7cu)

[Table S1. Baseline Characteristics of the students in the PP population 21](#_heading=h.pyqtogexdmd)

[Table S2. Comparison of primary outcomes between PP and ITT analyses. 22](#_heading=h.6idmo76j9vvk)

[Table S3. Comparison of acceptability domains between PP and ITT analyses 23](#_heading=h.cjib5bdj40g6)

[Table S4. Curricular theme performance for AI- and Human-gen examinations in PP and ITT analyses. 24](#_heading=h.6wp0ors9a63r)

[5. Supplementary Figures 25](#_heading=h.fd4rnaiv75wn)

[Figure S1. Distribution of examination completion times. 25](#_heading=h.rfyqeh4jwrep)

[Figure S2. Time required per MCQ by exam generation protocol. 26](#_heading=h.xeq6ygimfxw3)

[Figure S3. Distribution of item discrimination index (DI) values by exam generation protocol in the PP population. 27](#_heading=h.4qt3eube0ks)

[Figure S4. Distribution of discrimination efficiency (DE) values by exam generation protocol in the PP population. 28](#_heading=h.c39fgka3p9oe)

[Figure S5. Distribution of student performance by exam generation protocol in the PP population. 29](#_heading=h.1xkf1l2owel5)

[Figure S6.1. Performance by undergraduate academic background in the PP population. 30](#_heading=h.gz4edn4mkj92)

[Figure S6.2. Performance by undergraduate academic background in the ITT population. 31](#_heading=h.447z3dc17oem)

[Figure S7.1. Performance by curricular theme in the PP population. 32](#_heading=h.nhk7xtje6bk8)

[Figure S7.2. Performance by curricular theme in the ITT population. 33](#_heading=h.lhqedai0kkt5)

[Figure S8.1. Performance by gender in the PP population. 34](#_heading=h.mu4vyhegimbm)

[Figure S8.2. Performance by gender in the ITT population. 35](#_heading=h.gxdlyc3ngwnk)

[Figure S9. Comparison of PP and ITT DI distributions. 36](#_heading=h.cf71hk8l0gkd)

[Figure S10. Comparison of DI for PP and ITT populations. 37](#_heading=h.64voheavalrg)

[Figure S11. Acceptability metrics for PP population. 38](#_heading=h.fxusu1gwrw9p)

[6. Sample Paired AI-Gen and Human-Gen MCQs 39](#_heading=h.7snsgnymk2cg)

[7. Supplementary References 39](#_heading=h.yaizwdu9ejeq)

## 1. Supplementary Methods

### 1.1 Rationale for 35-Minute Completion Time Threshold

Both examination versions consisted of 112 case-based single-best-answer multiple-choice questions (MCQs), each requiring evaluation of clinical vignettes and five answer options. Based on comparable examinations administered at the University of British Columbia Faculty of Medicine, we estimated a reasonable completion time of approximately three hours for thoughtful engagement with this question format and quantity. However, recognizing that individual reading speeds, clinical reasoning efficiency, and test-taking strategies vary among students, we set the minimum threshold at 35 minutes—substantially below the expected completion time—to exclude only the most extreme cases of disengagement while retaining participants with faster but still meaningful completion patterns. Thirty-five minutes was chosen as a threshold to account for 5 minutes for pre- and post-exam survey completion and 30 minutes for actual exam time.

The appropriateness of the 35-minute threshold was validated through post-hoc analysis of actual completion times. Among all participants who submitted examinations (*N* = 258, before applying exclusion criteria), the mean completion time was 139.7 ± 42.8 minutes (**Figure S1**). The statistical lower boundary, defined as two standard deviations below the mean, was 54.1 minutes. Therefore, the pre-specified 35-minute exclusion criterion captured only responses that fell well outside the normal distribution of examination engagement—nearly 20 minutes below the statistical lower boundary. This conservative threshold ensured we retained participants with faster—but still meaningful—completion times while removing only those with implausibly rapid submissions that likely reflected random responding, pattern selection, or lack of genuine engagement with question content.

###

### 1.2 Application of Exclusion Criteria

A total of 10 participants (3.9% of enrolled participants) met pre-specified exclusion criteria: 4 from the AI-gen group (3.1%) and 6 from the Human-gen group (4.6%). Consistent with the intention-to-treat (ITT) principle, all 258 randomized participants were included in the primary analyses reported in the main manuscript (**Table 1**). Exclusion criteria were applied only to derive the per-protocol (PP) population, which included 123 participants in the AI-generated arm and 125 participants in the Human-generated arm (total N = 248, **Table S1**). The low and proportionally balanced exclusion rates across groups minimize the risk of differential attrition bias and support the use of PP analyses as a sensitivity comparison to ITT findings. **Figure S1** displays the distribution of completion times with the 35-minute exclusion threshold marked, demonstrating that excluded participants represented clear outliers relative to the overall engagement distribution.

### 1.3 Question Development Protocols

Both AI-generated and Human-generated questions were developed following standardized protocols to ensure methodological rigor and enable valid comparison. The protocols were designed to be parallel in structure while differing only in the source of question generation (AI models versus human authors) and the validation approach (dual-LLM verification versus peer review).

#### 1.3.1 Common Elements Across Both Protocols

To ensure content validity and comparability, both question development teams received identical instructions, question format requirements, and quality guidelines. Both teams received the weekly learning objectives derived from the official MEDD 411 curriculum. These objectives formed the blueprint for the actual summative examination, ensuring that mock examination questions assessed the same educational constructs as the high-stakes assessment. Each team developed 112 MCQs addressing the same distribution of learning objectives. All questions followed a single-best-answer format with five options (A-E); used case-based clinical vignettes; targeted moderate difficulty level; included comprehensive explanations for correct and incorrect answers; and featured plausible distractors from the same conceptual category. Question writers were also instructed to assess a single key concept (avoiding combining multiple learning objectives); use positively-phrased stems (avoiding “not” or “except” to ensure question clarity); prioritize clinically relevant scenarios over obscure facts; ensure all distractors were plausible within the clinical context; and avoid answer patterns (*e.g.*, “B” as the correct answer for consecutive questions).

The composition of the question-writing teams was identical. Each team comprised six second-year MD students from the UBC Faculty of Medicine class of 2027, all of whom had successfully completed MEDD 411 (examined course) one year prior. With the exception of the study lead, team members were blinded to the parallel group’s questions and development protocols to minimize contamination bias.

#### 1.3.2 AI-Gen Protocol

##### 1.3.2.1 General Principles

The objective of the following protocol is to generate examination questions using a standardized dual-LLM verification approach to maximize quality and accuracy while maintaining content validity aligned with course learning objectives. The required resources are ChatGPT-4.0 (OpenAI) for initial question generation and Google Gemini v1.5 Flash for independent cross-validation.

##### 1.3.2.2 Step 1: Initial Question Generation Using ChatGPT-4

Question developers used a structured prompt template to guide ChatGPT-4.0 in generating questions. The template included a prompt structure and question writers provided a learning objective and question stem as input parameters.

*Prompt Structure:*

“You are tasked with generating high-quality, case-based single-best-answer MCQs for a final exam for MD students. Use the framework below to create questions tailored to first-year MD students in Canada. Include in-depth explanations for why each option is right or wrong to teach the students.

- Pretend to be a specialist in the medical topic related to this question
- Make sure you double check your answers and explanation before you give the question
- The question MUST cover the following broad week objective: [WeekObjective]
- Question Stem: The question stem is what I want you to make the question about, or the main idea of the question. Consider this important point when making the question. [QuestionStem].
- Focus on testing one key concept. Each question should assess a single, significant concept. Avoid combining multiple ideas into one question, as this creates ambiguity. Do not use: multiple correct answers (questions must have only one definitive best answer); true/false statements (these fail to test critical thinking); or negatively phrased questions (e.g., ‘not’ or ‘except’, which can confuse test-takers). Prioritize clinically relevant or foundational topics. Do not include obscure or trivia-style facts that rely on rote memorization rather than understanding.
- The questions should have 5 options (A-E). The Answer Key should not be the same for multiple questions in a row. Ensure plausible and balanced answer choices. Answer options must be: plausible (all choices reasonable within the vignette) and similar (belong to the same category, *e.g.*, all diagnoses or treatments). Avoid nonsensical or unrealistic answers that cue the correct response. Example to avoid: ‘Patient reports visual hallucinations of pink elephants. What is the most likely psychiatric diagnosis? a. Bipolar disorder b. Major depressive episode c. Schizophrenia d. Psychosis e. The visual hallucinations are real.’ Option ‘e’ is clearly incorrect and reduces the question’s quality.”

*Input Parameters:*

- Week Objective: Specific learning objective from the MEDD 411 curriculum (*e.g.*, “Describe the normal physiology and determinants of blood pressure”)
- Question Stem: Developer-specified focus within the objective (*e.g.,* “Create a question testing understanding of blood pressure management in septic shock”)

##### 1.3.2.3 Step 2: Quality Review by Question Writer

The question writer reviewed each ChatGPT-generated MCQ for logical consistency across all answer options, accuracy of medical content and explanations, clinical plausibility of the case presentation, and alignment with the intended learning objective. If deficiencies were identified in any domain, the question was regenerated through iterative prompting until it met all predefined quality criteria.

##### 1.3.2.4 Step 3A: Cross-Verification Using Google Gemini v1.5 Flash

Questions writers used Google Gemini (v1.5 Flash) to validate the question, answer, and rationale produced by ChatGPT. Question writers provided the entirety of the ChatGPT output to Google Gemini with no modification, using the following prompt:

“I have a final exam question for MD students along with its answer key and explanation. I want you to verify that the question is correct, the answers make sense, and the explanation is accurate. I am using you as a second-check mechanism. Make sure you do not make any mistakes and double-check your reasoning.

- The final question is: [ChatGPT Output]
- If the question is correct, explain why. If it is incorrect, explain why.
- Pretend to be a specialist in the medical topic related to this question.”

##### 1.3.2.5 Step 3B: Confidence Verification

After Gemini provided initial feedback, developers asked the follow-up question: “Are you sure?” This additional prompt was designed to trigger deeper reasoning verification and reduce overconfidence in AI responses.

##### 1.3.2.6 Step 4: Decision Point and Documentation

If both ChatGPT and Gemini agreed and the question met all quality standards, the MCQ was finalized and added to the exam bank. If discrepancies were identified or quality concerns arose, question writers returned to Step 1 and modified the Question Stem (but not the Week Objective) to regenerate the question. Once the question was finalized, question writers recorded the time from Step 1 initiation through Step 4 for each MCQ, including all regeneration attempts if necessary.

It should be noted that throughout the AI-Gen protocol, no manual editing of AI-gen content was permitted (*i.e.*, writers could modify prompts, but could not modify LLM outputs). The goal of this was to maintain experimental integrity regarding true AI capability without human refinement, prevent human bias from confounding AI-gen content, and reflect realistic AI-only generation scenarios for scalability assessment.

#### 1.3.3 Human-Gen Protocol

##### 1.3.3.1 General Principles

The objective of the following protocol is to generate examination questions following traditional methods to serve as the control condition. The use of any AI tools was prohibited at all stages of question development, review, or editing. All Human-gen team members signed written confirmation that each MCQ was developed entirely without AI assistance.

##### 1.3.3.2 Step 1: Question Development

Question writers were provided with the same learning objectives as those provided for the AI-gen protocol. They were instructed to adhere to the same format requirements and quality guidelines as specified in the AI-gen protocol. They developed their question stem to address the learning objectives in the same manner as that used in the AI-gen protocol. Question writers drew on MEDD 411 lecture materials and course content, medical textbooks and primary literature, and prior experience with medical school examinations to inform their question development.

##### 1.3.3.3 Step 2: Peer Review Process

Human-gen MCQs underwent iterative peer review as follows:

1. Reviewer Assignment: Each question was randomly assigned to an independent peer reviewer (another member of the Human-gen team who did not write that specific question).
2. Blind Review: Reviewers attempted the question without knowing the intended answer key and evaluated the clarity of the clinical vignette, appropriateness of the question stem, accuracy of the answer key, and accuracy and completeness of the answer explanations.
3. Feedback and Revision: Reviewers provided written feedback via a collaborative spreadsheet. Original questions authors revised questions based on feedback. Multiple revision cycles were permitted until consensus was reached.

##### 1.3.3.4 Step 3: Time Documentation

Developers recorded total time spent on each question, including the initial question writing, development of all answer options and explanations, and any revisions required.

### 1.4 Content Validity and Curriculum Alignment

The MEDD 411 course curriculum includes learning objectives that serve as the blueprint for the official summative examination administered by the Faculty of Medicine. These objectives were developed by course directors and map to lecture-specific learning outcomes. To ensure that both the AI- and Human-gen exams assessed the same educational constructs, all questions were systematically mapped to these course objectives. Each MCQ in each exam addressed a single learning objective, and the same list of learning objectives was used to develop both the AI- and Human-gen exams.

### 1.5 Statistical Analysis

#### 1.5.1 General analytic approach

Primary analyses were conducted according to the intention-to-treat (ITT) principle. Per-protocol (PP) analyses were performed as secondary sensitivity analyses and are reported in Supplementary Results Section 2.1-2.4. All analyses were performed in R (version 2024.09.1+394). Descriptive statistics were calculated for all variables, with continuous variables reported as mean ± standard deviation (SD) and categorical variables as counts and percentages. Statistical significance was defined as a two-tailed *p* < 0.05. Effect sizes were reported using Cohen’s d for parametric comparisons and rank-biserial correlations (*rrb*) for non-parametric comparisons.

#### 1.5.2 Feasibility analysis

Efficiency ratios were calculated for each matched learning objective and summarized using mean ± SD. Differences in mean time per MCQ and total exam generation time between the Human-gen and AI-gen protocols were compared using two-tailed t-tests.

#### 1.5.3 Acceptability analysis

Perception ratings were compared using two-tailed t-tests.

#### 1.5.4 Reliability analysis

Item-level DI and DE values were calculated for the AI-generated and Human-gen exams. Since both DI and DE are item-level properties (*N* = 112 MCQs per exam), exam reliability was assessed by comparing the distributions of these psychometric metrics between the two exams. DI and DE distributions were non-normal by the Shapiro-Wilk test. Accordingly, between-exam comparisons were conducted using the non-parametric Wilcoxon rank-sum test. Rank-biserial correlation (*rrb*) was calculated as a non-parametric effect size. Effect sizes were interpreted using conventional thresholds (small: 0.10; moderate: 0.30).[1](https://www.zotero.org/google-docs/?6B2YR9) The uncertainty in mean DI and DE estimates was quantified using non-parametric bootstrap resampling (5,000 iterations) to generate 95% confidence intervals (CIs).

#### 1.5.5 Validity and subgroup analyses

Student performance outcomes were compared using Welch’s t-test to account for potentially unequal variances between groups. Cohen’s *d* was calculated to quantify the magnitude of the difference.

For curricular theme analyses, independent t-tests were performed for each of the eight themes. These analyses were exploratory and raw *p*-values are reported without multiplicity adjustment.

Subgroup comparisons were conducted using the Wilcoxon rank-sum test where score distributions were non-normal. Gender was treated as a binary variable, and students were given the option not to report their gender. Due to the low number of participants who either declined to disclose their gender or identified outside of the binary, these categories were excluded from the sub-group analysis.

#### 1.5.6 Educational impact

Changes in preparedness were analysed using a linear mixed-effects repeated-measures model with fixed effects for time (pre- versus post-exam), group (AI-gen versus Human-gen), and their interaction, and a random intercept for participants.

### 1.6 Survey Instruments

#### 1.6.1 Pre-Exam Survey

##### 1.6.1.1 Demographic and Academic Variables

Demographic Variables

1. Age (years; free-text entry)
2. Gender identity (multiple choice: Female, Male, Non-binary, Prefer not to say)

Academic Background

1. Undergraduate major (multiple choice: Health Sciences, Non–Health Sciences, Other)
2. Undergraduate GPA (self-reported percentage; free-text entry)
3. Average weekly study time for medical school coursework (self-reported hours; free-text entry)

AI Familiarity

1. How familiar are you with the use of AI tools (*e.g.,* ChatGPT, Google Bard) in your medical education? (multiple-choice: Very familiar, Familiar, Neutral, Somewhat familiar, Not familiar at all)

##### 1.6.1.2 Self-Efficacy and Learning Strategy Assessment

All items were rated on 10-point Likert scales where 1 = Not at all confident/sufficient and 10 = Extremely confident/sufficient.

1. How confident are you in your understanding of the material covered in the mock exam?
2. How confident are you in your ability to perform well on multiple-choice questions?
3. How confident are you in your ability to manage time effectively during exams?
4. How sufficient do you feel the resources you’ve used to study (*e.g.*, textbooks, lectures, online materials) have been in preparing you for the mock exam?
5. How confident are you in your ability to recall key information during the mock exam?
6. How extensively have you used flashcard apps (*e.g.*, Anki) during your medical education? (1 = Not at all, 10 = Very extensively)

#### 1.6.2 Post-Exam Survey

The post-exam survey was completed by all consenting students immediately after exam submission and before students could access their scores or answer explanations to ensure that student perception metrics were not affected by their score. All items were rated on 10-point Likert scales.

1. How difficult did you find the exam overall? (1 = Very easy, 10 = Extremely difficult)
2. How clear were the exam questions? (1 = Very unclear/confusing, 10 = Extremely clear)
3. How relevant were the exam questions to the course material? (1 = Not relevant at all, 10 = Extremely relevant)
4. Did you feel you had enough time to complete the exam? (1 = Not enough time at all, 10 = More than enough time)
5. How would you rate the quality of the multiple-choice questions? (1 = Very poor quality, 10 = Excellent quality)
6. After completing the exam, how confident are you in your understanding of the clinical concepts covered? (1 = Not at all confident, 10 = Extremely confident)
7. How prepared do you feel overall for the upcoming real [summative] exam? (1 = Not at all prepared, 10 = Extremely prepared; this metric was assessed in both the pre- and post-exam surveys)
8. How much did the exam help you identify areas where you need to improve your understanding? (1 = Did not help at all, 10 = Helped extremely well)
9. How confident are you that you will retain the information tested in the exam for future clinical practice? (1 = Not at all confident, 10 = Extremely confident)

## 2. Supplementary Per-Protocol (PP) Results

Per-protocol (PP) analyses were conducted including participants who met all pre-specified eligibility criteria and completed the mock examination with evidence of adequate engagement. These analyses were designed to evaluate exam performance under optimal test-taking conditions and to minimize noise introduced by minimally engaged participants. ITT analyses, which included all randomized participants (N = 258; Human-generated exam arm N = 131; AI-generated exam arm N = 127; see CONSORT flow diagram in **Figure 2** of the main manuscript), were conducted for comparison to assess the robustness of PP findings to inclusion criteria. Baseline characteristics of the PP population are summarized in Table S1.

### 2.1 Acceptability Measures

Students’ perceptions of the AI- and Human-gen exams in the PP population are compared in Figure S11 (PP *N* = 248; AI-gen *N* = 123, Human-gen *N* = 125). Using Welch t-tests with *p*-values, ratings were similar across most acceptability domains. Four domains showed small differences favoring the Human-gen exam: Identifying knowledge gaps (AI-gen 7.31 versus Human-gen 7.89; *p* = 0.0115), Retention of information for future practice (AI-gen 5.87 versus Human-gen 6.38; *p* = 0.0254), Understanding clinical concepts (AI-gen 5.81 versus Human-gen 6.22; *p* = 0.0346), and General preparedness for the real exam (AI-gen 5.72 versus Human-gen 6.14; *p* = 0.0443). All other domains were not statistically different: Clarity of questions (*p* = 0.857), Enough time to complete exam (*p* = 0.201), Overall difficulty (*p* = 0.126), Question quality (*p* = 0.407), and Relevance to course material (*p* = 0.110). Across all domains, mean differences were small in magnitude (absolute mean differences between 0.05–0.58 on the 0–10 scale).

### 2.2 Reliability Measures

#### 2.2.1 Item Discrimination (DI):

In the per-protocol (PP) analysis, Human-gen MCQs demonstrated significantly higher item-level discrimination than AI-generated MCQs (mean DI: 0.21 [95% bootstrap CI 0.18–0.24] vs. 0.17 [0.14–0.20]; *p* = 0.030). Although this difference reached statistical significance, the magnitude of the effect was small.

When compared with the intention-to-treat (ITT) population, DI values were modestly higher in both exam arms (Human-gen: 0.25 [0.22–0.27]; AI-gen: 0.19 [0.16–0.22]; p = 0.002). The higher absolute DI values observed in the ITT analysis are likely attributable to the inclusion of minimally engaged participants. Such participants tend to cluster within the lower-performance tail of the score distribution, which mathematically increases the separation between upper and lower scoring groups used in DI calculations.

Despite these differences in absolute DI values, the direction of the effect remained consistent across analytic populations, with Human-gen items demonstrating greater discrimination than AI-generated items. Comparisons of DI distributions and mean values across PP and ITT populations are shown in Figures S9 and S10.

#### 2.2.2 Distractor Efficiency (DE)

In the PP analysis, no statistically significant difference in DE was observed between protocols (mean DE: 37.8% ± 29.9% for Human-gen versus 31.5% ± 27.0% for AI-gen; Wilcoxon rank-sum test, W = 7055, *p* = 0.123). The associated effect size was small (*rrb* = 0.115). Bootstrap resampling demonstrated overlapping 95% confidence intervals (Human-gen: 32.3%–43.4%; AI-gen: 26.8%–36.6%), indicating comparable distractor plausibility between exams.

### 2.3 Validity Measures

#### 2.3.1 Mean Exam Scores

In the PP population, students assigned to the Human-gen exam achieved higher mean scores than those assigned to the AI-generated exam (mean ± SD: 74.6% ± 9.1% versus 71.7% ± 7.1%). This difference reached statistical significance (*p* = 0.005); however, the associated effect size was small (Cohen’s *d* = 0.36), indicating substantial overlap in score distributions between groups. When the analysis was expanded to the ITT population, mean exam scores were 73.4% ± 12.3% for the Human-gen exam and 71.0% ± 9.0% for the AI-generated exam. Although the direction of the difference was preserved, the magnitude of the effect was attenuated and no longer statistically significant (*p* = 0.083; Cohen’s *d* = 0.22), consistent with a smaller and less precise group difference. The attenuation observed in the ITT analysis was primarily attributable to increased score variability in the Human-generated arm, where inclusion of six minimally engaged participants increased the standard deviation from 9.1% in the PP population to 12.3% in the ITT population. This additional variance reduced the precision of the estimated group difference without materially altering its direction.

Taken together, these findings suggest that while the PP analysis identified a statistically significant difference under conditions of adequate engagement, the small effect size and attenuation in the ITT analysis indicate that overall performance differences between AI-gen and Human-gen exams were modest and did not meaningfully diverge across analytic populations.

#### 2.3.2 Subgroup Analysis: Performance by Undergraduate Academic Background

We evaluated whether exam performance differed by undergraduate academic background and whether any such differences depended on whether students completed the AI-gen versus Human-gen mock exam. Undergraduate background was categorized as Medical/Health Sciences (biology, biochemistry, nursing, or other health-related degrees) or Non-medical/Non-health Sciences (arts, social sciences, engineering, business, or other non-health-related degrees). Students who selected “Other” but could not be confidently classified were excluded from subgroup analyses.

In the PP population, 244 participants were available for subgroup analysis. Four participants were excluded because their undergraduate academic background was reported as “Other” and could not be classified as either medical or non-medical. Subgroup sizes were as follows: AI-gen exam: medical *N* = 104, non-medical *N* = 17; Human-generated exam: medical *N* = 113, non-medical *N* = 10. Within both examination arms, the mean scores were statistically indistinguishable across academic backgrounds (Figure S6.1). In the AI-gen exam, students with the medical background scored 71.8% ± 7.3% (mean ± SD), compared with 70.9% ± 6.3% among those with a non-medical background (Wilcoxon rank-sum test: W = 1012, *p* = 0.341; *rrb*= 0.14). In the Human-gen exam, medical-background students scored 74.7% ± 9.1% versus 72.8% ± 10.1% for students with non-medical-backgrounds (W = 609, *p* = 0.687; *rrb*= 0.14). Levene’s tests did not show a meaningful heterogeneity of variance (AI-gen: *p* = 0.731; Human-gen: *p* = 0.591).

#### 2.3.3 Subgroup Analysis: Performance by Curricular Theme

Per-protocol analyses were conducted as a sensitivity analysis including participants who met all pre-specified engagement criteria (Figure S7.1). Theme-level patterns observed in the PP population were consistent with the primary ITT analysis. Specifically, the same curricular themes favored Human-gen items (Heart Murmur, Upper Gastrointestinal Tract, Pregnancy, and Diabetes), while Nutrient Absorption favored AI-gen items, and no meaningful differences were observed for Hypertension, Infertility, or Lower Gastrointestinal Tract (Table S4).

As in the ITT analysis, effect sizes (|d| ≈ 0.09–0.33) remained small across themes, indicating minimal practical differences in performance between examination formats. The consistency in direction and magnitude of effects across analytic populations supports the robustness of the primary ITT findings.

#### 2.3.4 Subgroup Analysis: Performance by Gender

In the PP population, 237 participants were included in the gender subgroup analysis. Eleven participants were excluded due to missing gender data or self-identification outside the male/female categories, given insufficient sample size for separate subgroup evaluation. Subgroup sizes were: AI-generated exam: male *N* = 45 and female *N* = 72; Human-generated exam: male *N* = 56 and female *N* = 64. Within the AI-gen exam, male students achieved higher mean scores than female students (73.5% ± 6.2 versus 70.7% ± 7.3; W = 2005.5, *p* = 0.0308; *rrb* = 0.24), corresponding to a small-to-moderate effect size (Figure S8.1). In contrast, there was no statistically significant gender difference observed within the Human-gen exam (male: 74.5% ± 10.8; female: 74.3% ± 7.6; W = 1946, *p* = 0.419; *rrb* = 0.09).

### 2.4 Educational impact

In the PP population (*N* = 248), findings were consistent with the primary ITT analysis. A mixed-effects repeated-measures model (random intercept for participant) demonstrated no statistically significant main effects of time (pre- versus post; F(1,247) = 3.24, *p* = 0.073, η²p = 0.01), group assignment (AI-gen versus Human-gen; F(1,247) = 2.53, *p* = 0.113, η²p = 0.01), or time × group interaction (F(1,247) = 1.06, p = 0.303, η²p = 0.004). Within-group comparisons showed small increases in preparedness in both groups (AI-gen: mean difference = 0.074, SE = 0.142, *p* = 0.604; Human-gen: mean difference = 0.272, SE = 0.131, *p* = 0.040). Although the change in the Human-gen group reached statistical significance, the magnitude of improvement remained below the pre-specified effect size of 0.5, indicating limited practical significance.

##

## 3. Supplementary Intention-to-treat (ITT) Results

### 3.1 Subgroup Analysis: Performance by Undergraduate Academic Background

In the ITT population, 250 participants were available for subgroup analysis. Eight participants were excluded because their undergraduate academic background was reported as “Other” and could not be classified as either medical or non-medical. Subgroup sizes were as follows: AI-gen exam: medical background *N* = 105, non-medical background *N* = 17; Human-gen exam: medical background *N* = 117, non-medical *N* = 11. In the AI-gen exam, students with a medical background scored 71.5% ± 8.1% (mean ± SD), compared with 70.9% ± 6.3% among those with a non-medical background (Wilcoxon rank-sum test: W = 1012, *p* = 0.378, *rrb* = 0.13; Figure S6.2). In the Human-gen exam, students with medical backgrounds scored 73.3% ± 12.6% versus 72.8% ± 9.6% for students with non-medical-backgrounds (W = 685, *p* = 0.730; *rrb*= 0.06). Levene’s tests did not show a meaningful within-group heterogeneity of variance (AI-gen: *p* = 0.615; Human-gen: *p* = 0.797).

### 3.2 Subgroup Analysis: Performance by Curricular Theme

Each of the AI-gen and Human-gen examinations included 14 questions distributed across eight predefined curricular themes (Figure S7.2). Theme-level performance was evaluated by comparing mean scores between examination formats within each theme using independent-samples t-tests. Raw p-values and standardized mean differences (Cohen’s d; AI − Human) are presented descriptively. Results for the ITT population are summarized in Table S4. In the ITT analysis, four curricular themes which are Heart Murmur, Upper Gastrointestinal Tract, Pregnancy, and Diabetes demonstrated higher mean performance on Human-gen items compared with AI-gen items. In contrast, Nutrient Absorption showed higher performance on AI-generated items. No statistically meaningful differences were observed between examination formats for Hypertension, Infertility, or Lower Gastrointestinal Tract.

Although several theme-level comparisons reached statistical significance, standardized effect sizes were small across themes (|d| ≈ 0.09–0.33), indicating limited practical differences in student performance between examination formats at the curricular theme level.

### 3.3 Subgroup Analysis: Performance by Gender

We examined whether examination performance differed by gender within the AI-gen and Human-gen mock exams. Analyses were restricted to students who self-identified as male or female; participants reporting other gender identities or missing gender data were excluded due to small subgroup sizes.

In the ITT population, 243 participants were included in the gender subgroup analysis. Fifteen participants were excluded due to missing gender data or self-identification outside the male/female categories, given insufficient sample size for separate subgroup evaluation. Subgroup sizes were: AI-gen exam: male *N* = 45 and female *N* = 74; Human-gen exam: male *N* = 59 and female *N* = 65. Within the AI-gen exam, male students achieved significantly higher mean scores than female students (73.5% ± 6.2 vs. 69.5% ± 10.1; W = 2095.5, *p* = 0.0183; *rrb* = 0.26), corresponding to a small-to-moderate effect size (Figure S8.2). In contrast, there was no statistically significant gender difference observed within the Human-gen exam (male: 72.8% ± 14.6; female: 73.4% ± 10.4; W = 2057.5, *p* = 0.485; *rrb* = 0.07).

##

## 4. Supplementary Tables

### Table S1. Baseline Characteristics of the students in the PP population

| Variable | AI-gen exam  (N= 123) | Human-gen exam  (N=125) | p-Value |
| --- | --- | --- | --- |
| Age, Mean (SD) | 24.6 (3.0) | 25.0 (3.5) | 0.31 |
| Students' academic level characteristics, Mean (SD) | | | |
| GPA % | 92.3 (5.7) | 92.0 (5.2) | 0.62 |
| Hours studying per week | 22.8 (17.0) | 23.7 (16.3) | 0.65 |
| Knowledge confidence* | 5.9 (1.4) | 6.1 (1.6) | 0.18 |
| Preparation level for real exam* | 5.7 (1.4) | 5.9 (1.6) | 0.31 |
| Test-taking skills* | 6.7 (1.7) | 6.8 (1.8) | 0.57 |
| Time management skills* | 7.0 (1.9) | 6.9 (2.2) | 0.56 |
| Sufficiency of study resources* | 6.6 (1.7) | 6.7 (1.6) | 0.42 |
| Retention of information* | 6.0 (1.6) | 6.0 (1.8) | 0.82 |
| Flashcard usage* | 5.9 (3.0) | 6.1 (2.9) | 0.59 |
| Gender (%) |  |  |  |
| Female | 72 (58.5) | 65 (52.0) | 0.45 |
| Male | 45 (36.6) | 56 (44.8) |  |
| Non-binary | 1 (0.8) | 0 (0.0) |  |
| Prefer not to say | 5 (4.1) | 4 (3.2) |  |
| Major prior to MD school |  |  |  |
| Health sciences | 100 (81.3) | 112 (89.6) | 0.18 |
| Non-health sciences | 17 (13.8) | 10 (8.0) |  |
| Other | 6 (4.9) | 3 (2.4) |  |
| Familiarity with AI in education |  |  |  |
| Very familiar | 9 (7.3) | 15 (12.0) | 0.51 |
| Familiar | 43 (35.0) | 36 (28.8) |  |
| Neutral | 19 (15.4) | 15 (12.0) |  |
| Somewhat familiar | 45 (36.6) | 49 (39.2) |  |
| Not familiar at all | 7 (5.7) | 10 (8.0) |  |
| * Denotes students’ self-assessments on a 10-point Likert scale | | | |

**Table S1.** Baseline demographic and academic characteristics are presented for students randomized to the AI- and human-gen exams. Continuous variables are reported as mean (SD), and categorical variables are presented as counts with percentages. Self-assessment measures (marked with *) were collected using a 10-point Likert scale evaluating perceived knowledge confidence, exam preparedness, study habits, and learning resources. No statistically significant differences were observed between groups across demographic characteristics, prior academic background, study behaviors, or familiarity with artificial intelligence in education, indicating comparable baseline characteristics between exam groups prior to analysis.

### Table S2. Comparison of primary outcomes between PP and ITT analyses.

| Outcome | PP analysis (*N* = 248) | ITT analysis  (*N* = 258) | Interpretation |
| --- | --- | --- | --- |
| Exam score  (mean ± SD) | Human: (74.6 ± 9.1)  AI: (71.7 ± 7.1)  *p* = 0.005; *d* = 0.36 | Human: (73.4 ± 12.3)  AI: (71.0 ± 9.0)  *p* = 0.083; *d* = 0.22 | In the ITT analysis, performance differences were modest. Although the PP analysis reached statistical significance under adequate engagement, the effect size was small and the finding was attenuated to non-significant in ITT population |
| Item DI (mean [95% bootstrap CI]) | Human: 0.21 [0.18–0.24]  AI: 0.17 [0.14–0.20]  *p* = 0.030 | Human: 0.25 [0.22–0.27]  AI: 0.19 [0.16–0.22]  *p* = 0.002; *rrb* = 0.310 | Human-gen items demonstrated higher discrimination in both analyses. Higher absolute DI values in ITT reflect mathematical inflation due to inclusion of minimally engaged participants widening score separation. |
| Distractor Efficiency (mean ± SD) | Human: 37.8% ± 29.9%  AI: 31.5% ± 27.0%  *p* = 0.123; *rrb* = 0.115 | Human: 39.8% ± 30.4%  AI: 32.6% ± 27.2%  *p* = 0.070; *rrb* = 0.135 | No statistically significant difference in DE between protocols in either analytic population. Differences were small and CIs overlapped. |

**Table S2.** Summary statistics for the primary outcomes are presented for both analytic populations (ITT versus PP). Exam performance is reported as mean score (±SD) for AI- and human-gen exams with corresponding *p*-values and Cohen’s *d*. Item discrimination index (DI) values are reported as means with 95% bootstrap confidence intervals, and distractor efficiency (DE) is reported as mean ± SD.

### Table S3. Comparison of acceptability domains between PP and ITT analyses

| Acceptability metric | PP Analysis | | | ITT Analysis | | |
| --- | --- | --- | --- | --- | --- | --- |
| Mean difference (Human − AI)  [95% CI] | *p* value | Cohen’s *d* | Mean difference (Human − AI)  [95% CI] | *p* value | Cohen’s *d* |
| Clarity of questions | −0.05 [−0.57, 0.47] | 0.86 | −0.02 | −0.09 [−0.60, 0.43] | 0.74 | −0.04 |
| Enough time to complete exam | −0.30 [−0.77, 0.16] | 0.20 | −0.16 | −0.28 [−0.76, 0.21] | 0.26 | −0.14 |
| General preparedness for real exam | −0.42 [−0.83, −0.01] | 0.04 | −0.26 | −0.43 [−0.84, −0.01] | 0.04 | −0.26 |
| Identifying knowledge gaps | −0.58 [−1.03, −0.12] | 0.01 | −0.32 | −0.57 [−1.03, −0.11] | 0.01 | −0.31 |
| Overall difficulty | 0.31 [−0.09, 0.70] | 0.13 | 0.20 | 0.35 [−0.04, 0.74] | 0.08 | 0.22 |
| Question quality | −0.23 [−0.77, 0.31] | 0.41 | −0.11 | −0.26 [−0.80, 0.28] | 0.33 | −0.12 |
| Relevance to course material | −0.38 [−0.83, 0.08] | 0.11 | −0.20 | −0.37 [−0.83, 0.10] | 0.12 | −0.19 |
| Retention of information for future practice | −0.51 [−0.96, −0.06] | 0.03 | −0.29 | −0.50 [−0.95, −0.05] | 0.03 | −0.28 |
| Understanding clinical concepts | −0.41 [−0.79, −0.03] | 0.04 | −0.27 | −0.40 [−0.78, −0.01] | 0.04 | −0.26 |

**Table S3.** Mean differences (Human − AI) with 95% confidence intervals, p-values, and standardized effect sizes (Cohen’s *d*) are reported for nine predefined acceptability domains. Across analytic populations, mean differences were small in magnitude (absolute differences ≤ 0.58 on a 10-point scale), with effect sizes consistently negligible to small (|*d*| ≤ 0.32).

### Table S4. Curricular theme performance for AI- and Human-gen examinations in PP and ITT analyses.

| Theme | PP | | | | ITT | | | | Direction for both ITT and PP |
| --- | --- | --- | --- | --- | --- | --- | --- | --- | --- |
| PP AI  (Mean ± SD) | PP Human  (Mean ± SD) | PP  *p*-value | PP *d*  (AI − H) | ITT AI (Mean ± SD) | ITT  Human (Mean ± SD) | ITT  *p*-value | ITT *d*  (AI − H) |
| Heart Murmur | 65.2 ± 47.6 | 80.2 ± 39.8 | <0.001 | −0.342 | 64.5 ± 47.9 | 79.0 ± 40.8 | <0.001 | −0.325 | Human > AI |
| Upper GI | 78.5 ± 41.1 | 85.3 ± 35.4 | <0.001 | −0.179 | 77.6 ± 41.7 | 83.9 ± 36.8 | <0.001 | −0.159 | Human > AI |
| Pregnancy | 68.5 ± 46.5 | 75.0 ± 43.3 | <0.001 | −0.145 | 67.8 ± 46.7 | 73.8 ± 44.0 | <0.001 | −0.132 | Human > AI |
| Diabetes | 76.5 ± 42.4 | 81.1 ± 39.2 | <0.001 | −0.113 | 75.9 ± 42.8 | 79.6 ± 40.3 | 0.007 | −0.090 | Human > AI |
| Nutrient Absorption | 81.0 ± 39.3 | 71.1 ± 45.3 | <0.001 | 0.231 | 79.9 ± 40.1 | 69.9 ± 45.9 | <0.001 | 0.231 | AI > Human |
| Hypertension | 76.5 ± 42.4 | 76.6 ± 42.4 | 0.950 | −0.002 | 76.4 ± 42.6 | 76.8 ± 42.1 | 0.526 | −0.015 | No diff |
| Infertility | 68.0 ± 46.7 | 66.6 ± 47.2 | 0.388 | 0.029 | 67.5 ± 46.9 | 66.8 ± 47.0 | 0.200 | 0.041 | No diff |
| Lower GI | 59.2 ± 49.2 | 61.0 ± 48.8 | 0.265 | −0.038 | 58.7 ± 49.4 | 60.1 ± 48.9 | 0.503 | −0.032 | No diff |

**Table S4.** Mean exam scores (±SD) are presented for each curricular theme, comparing AI- and human-gen items. P-values correspond to independent-samples comparisons between exam types within each theme, and standardized effect sizes are reported as Cohen’s *d* (AI − Human). The final column summarizes the direction of the observed difference across both analytic populations. Across themes, performance modestly favored human-generated items for heart murmur, upper gastrointestinal tract, pregnancy, and diabetes, whereas AI-generated items showed higher performance for nutrient absorption; no meaningful differences were observed for hypertension, infertility, or lower gastrointestinal themes.

## 5. Supplementary Figures

### Figure S1. Distribution of examination completion times.


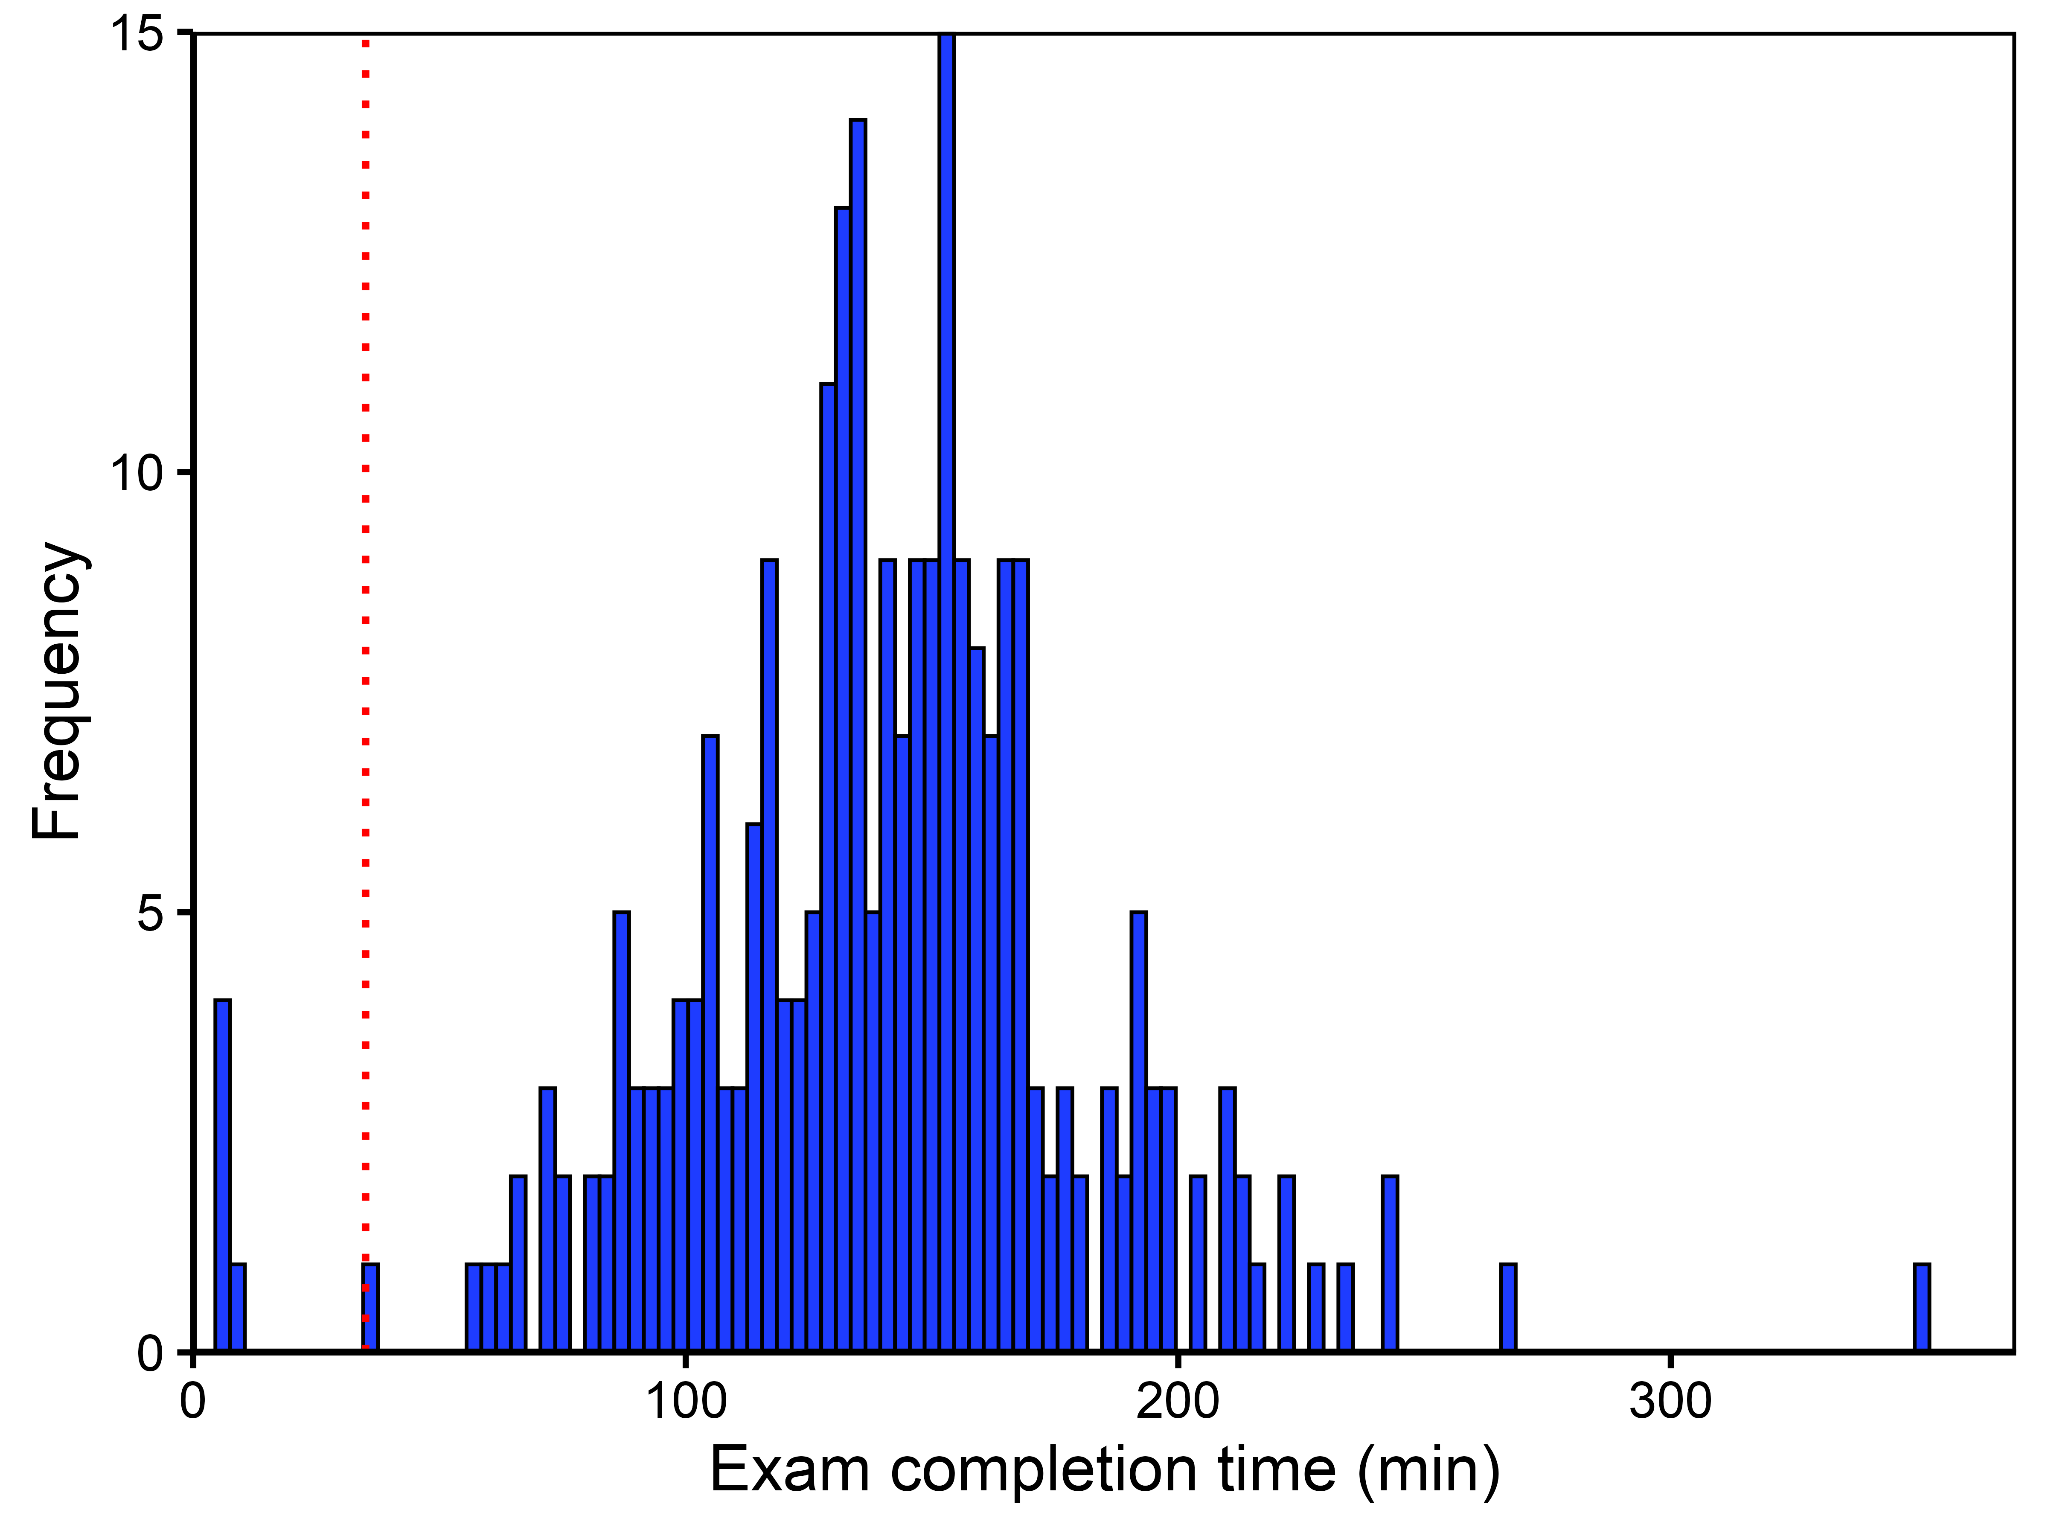


**Figure S1.** Histogram showing the distribution of exam completion times (minutes) among all participants who submitted responses (N = 258) prior to applying exclusion criteria. The vertical dashed red line indicates the pre-specified 35-minute exclusion threshold for insufficient engagement (5 mins for pre- and post-exam survey and 30 mins for exam completion time). Mean completion time was 139.7 ± 42.8 minutes. The 35-minute threshold excluded six participants with extremely short completion times, consistent with random responding or lack of meaningful engagement with the examination.

### Figure S2. Time required per MCQ by exam generation protocol.


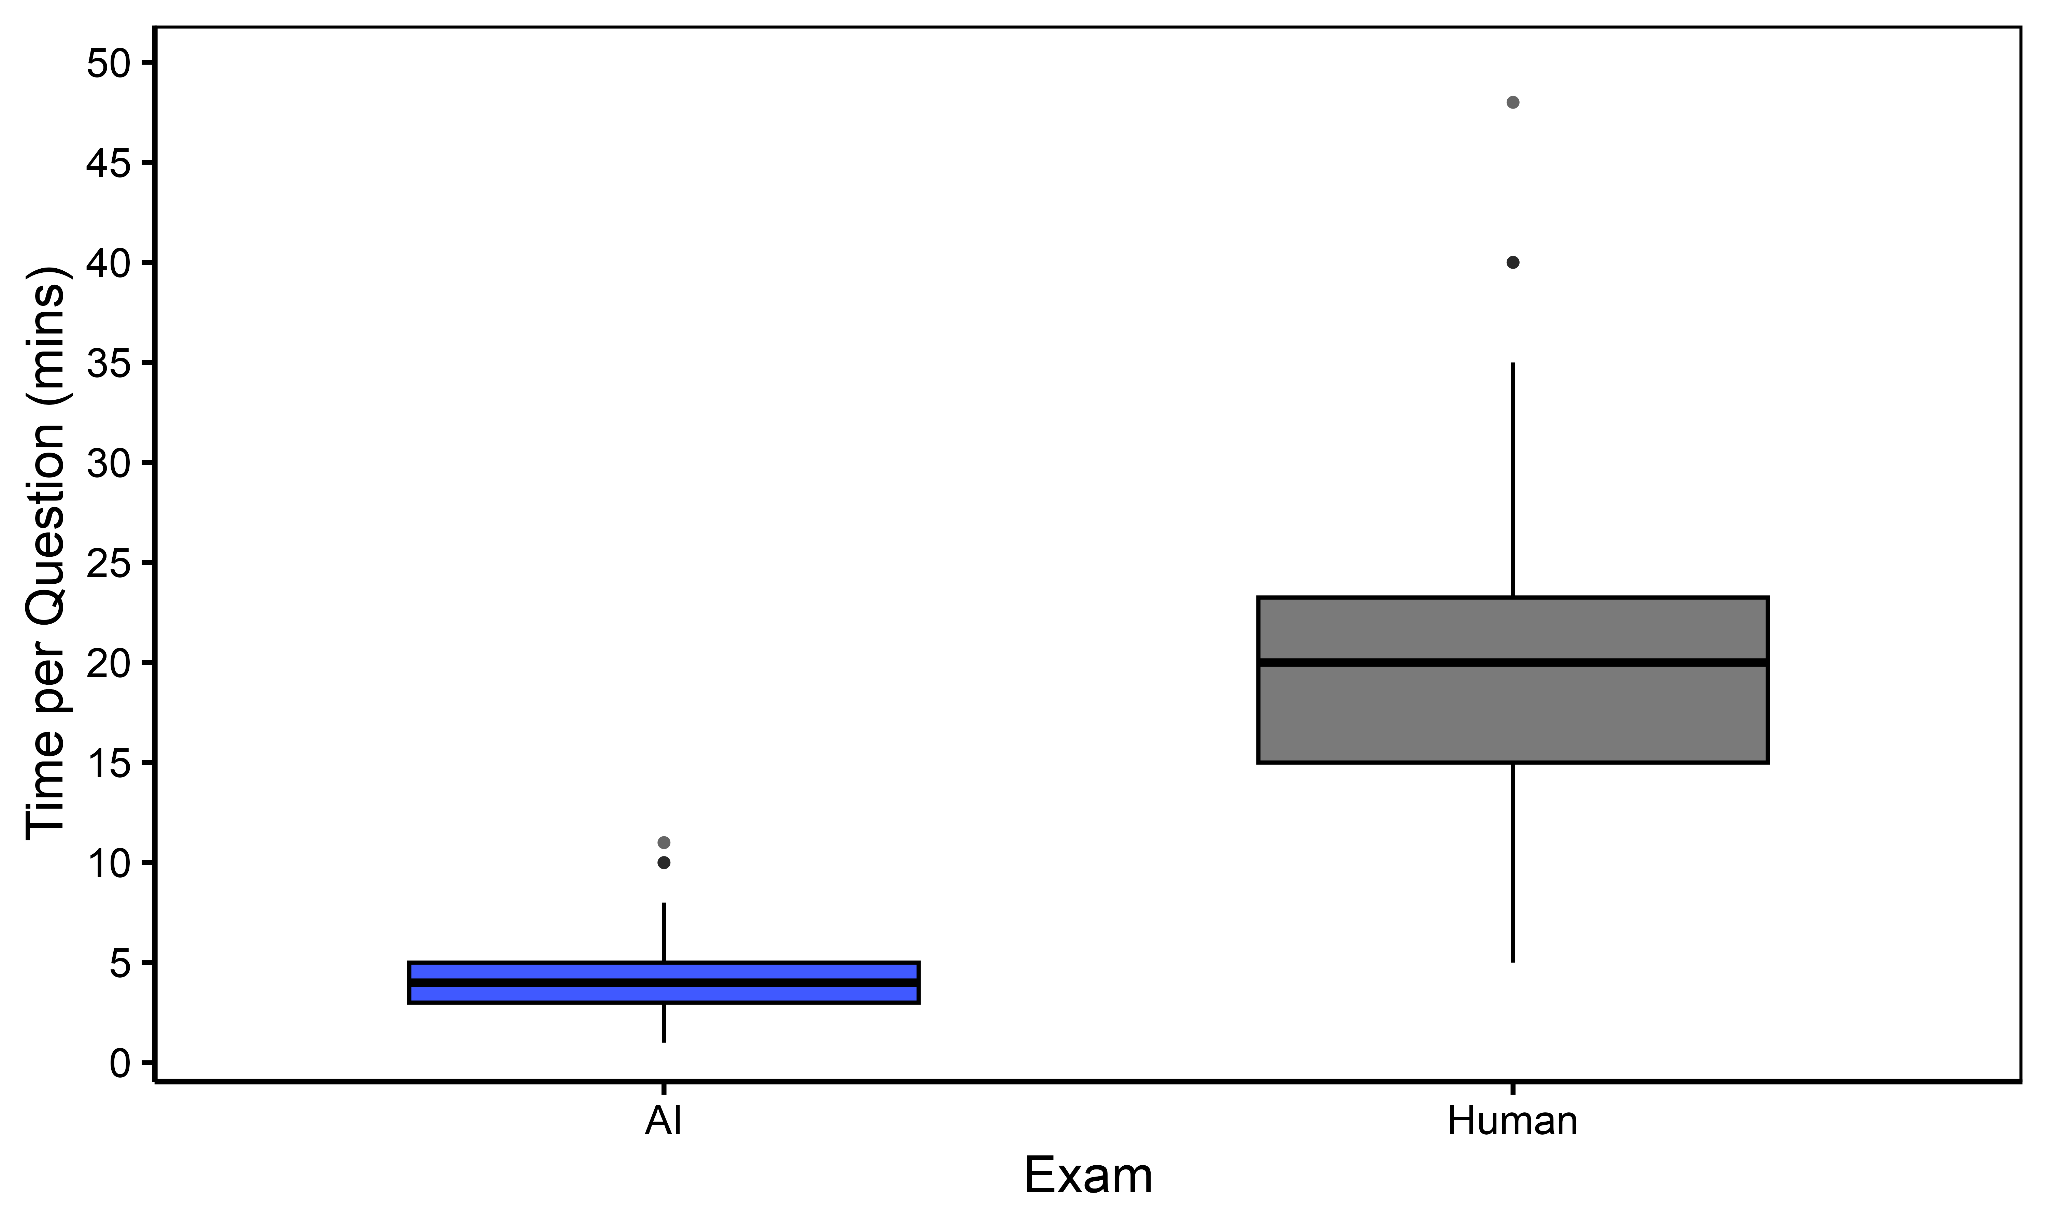


**Figure S2.** Boxplots comparing the time required to produce individual MCQs for the AI- and human-gen exam. The box midline represents the median time; box limits indicate the interquartile range (IQR, 25th–75th percentile); and whiskers extend to the most extreme data points within 1.5 × IQR of the quartiles. Data points beyond this range are plotted individually.

### Figure S3. Distribution of item discrimination index (DI) values by exam generation protocol in the PP population.


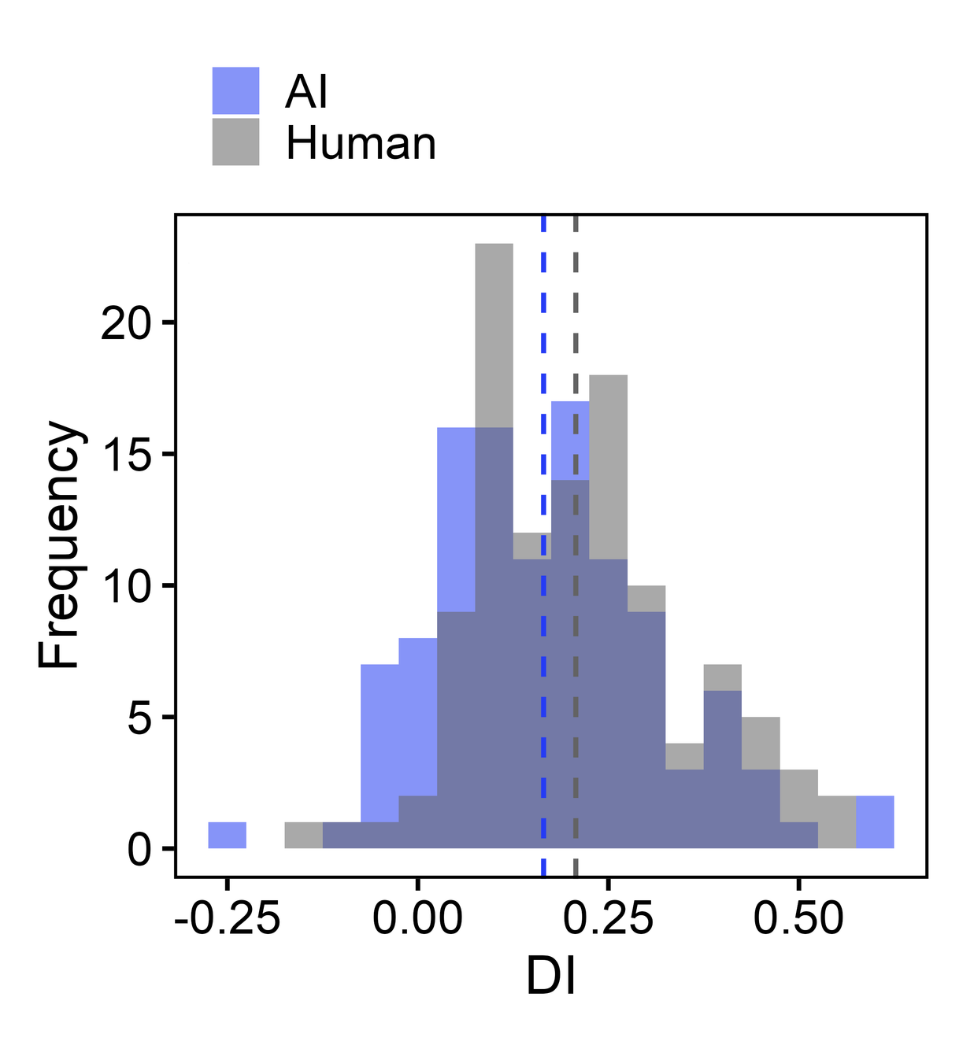


**Figure S3.** Histogram showing the distribution of item-level DI values for AI- and human-gen MCQs. The distribution for human-gen items is shifted to the right relative to AI-generated items, indicating a higher frequency of items with higher discriminatory power. Dashed blue and grey vertical lines represent the mean DI values for the AI-generated and human-generated exams, respectively.

### Figure S4. Distribution of discrimination efficiency (DE) values by exam generation protocol in the PP population.


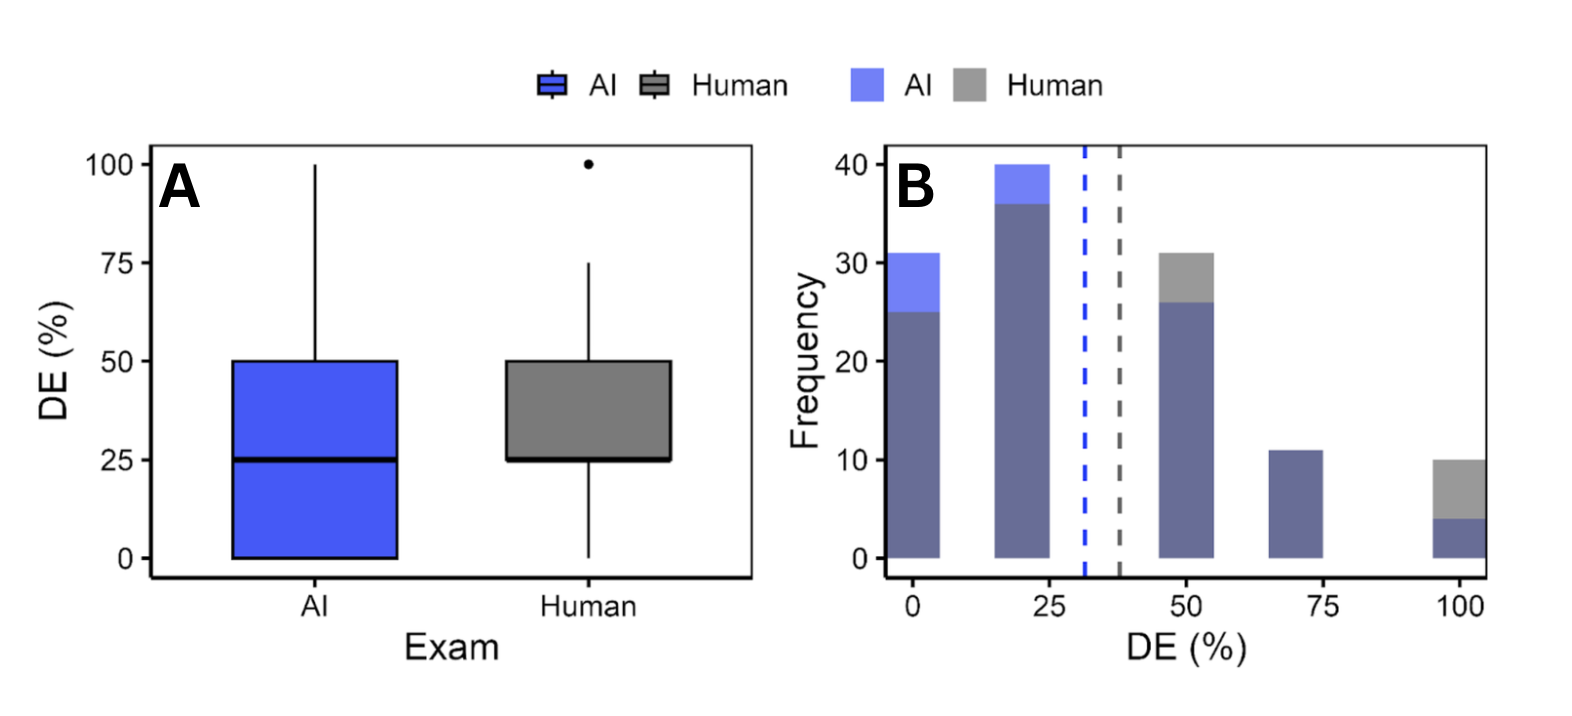


**Figure S4.** (A) Boxplots comparing DE values for the AI- and human-gen exams in the PP population. The box midline represents the median DE; box limits indicate the interquartile range (IQR); and whiskers extend to 1.5 × IQR. Data points beyond this range are plotted individually. (B) Distribution of DE values for AI-generated (blue) and human-generated (grey) MCQs. Dashed vertical lines indicate the mean DE for each exam (AI-gen in blue; human-gen in grey).

### Figure S5. Distribution of student performance by exam generation protocol in the PP population.


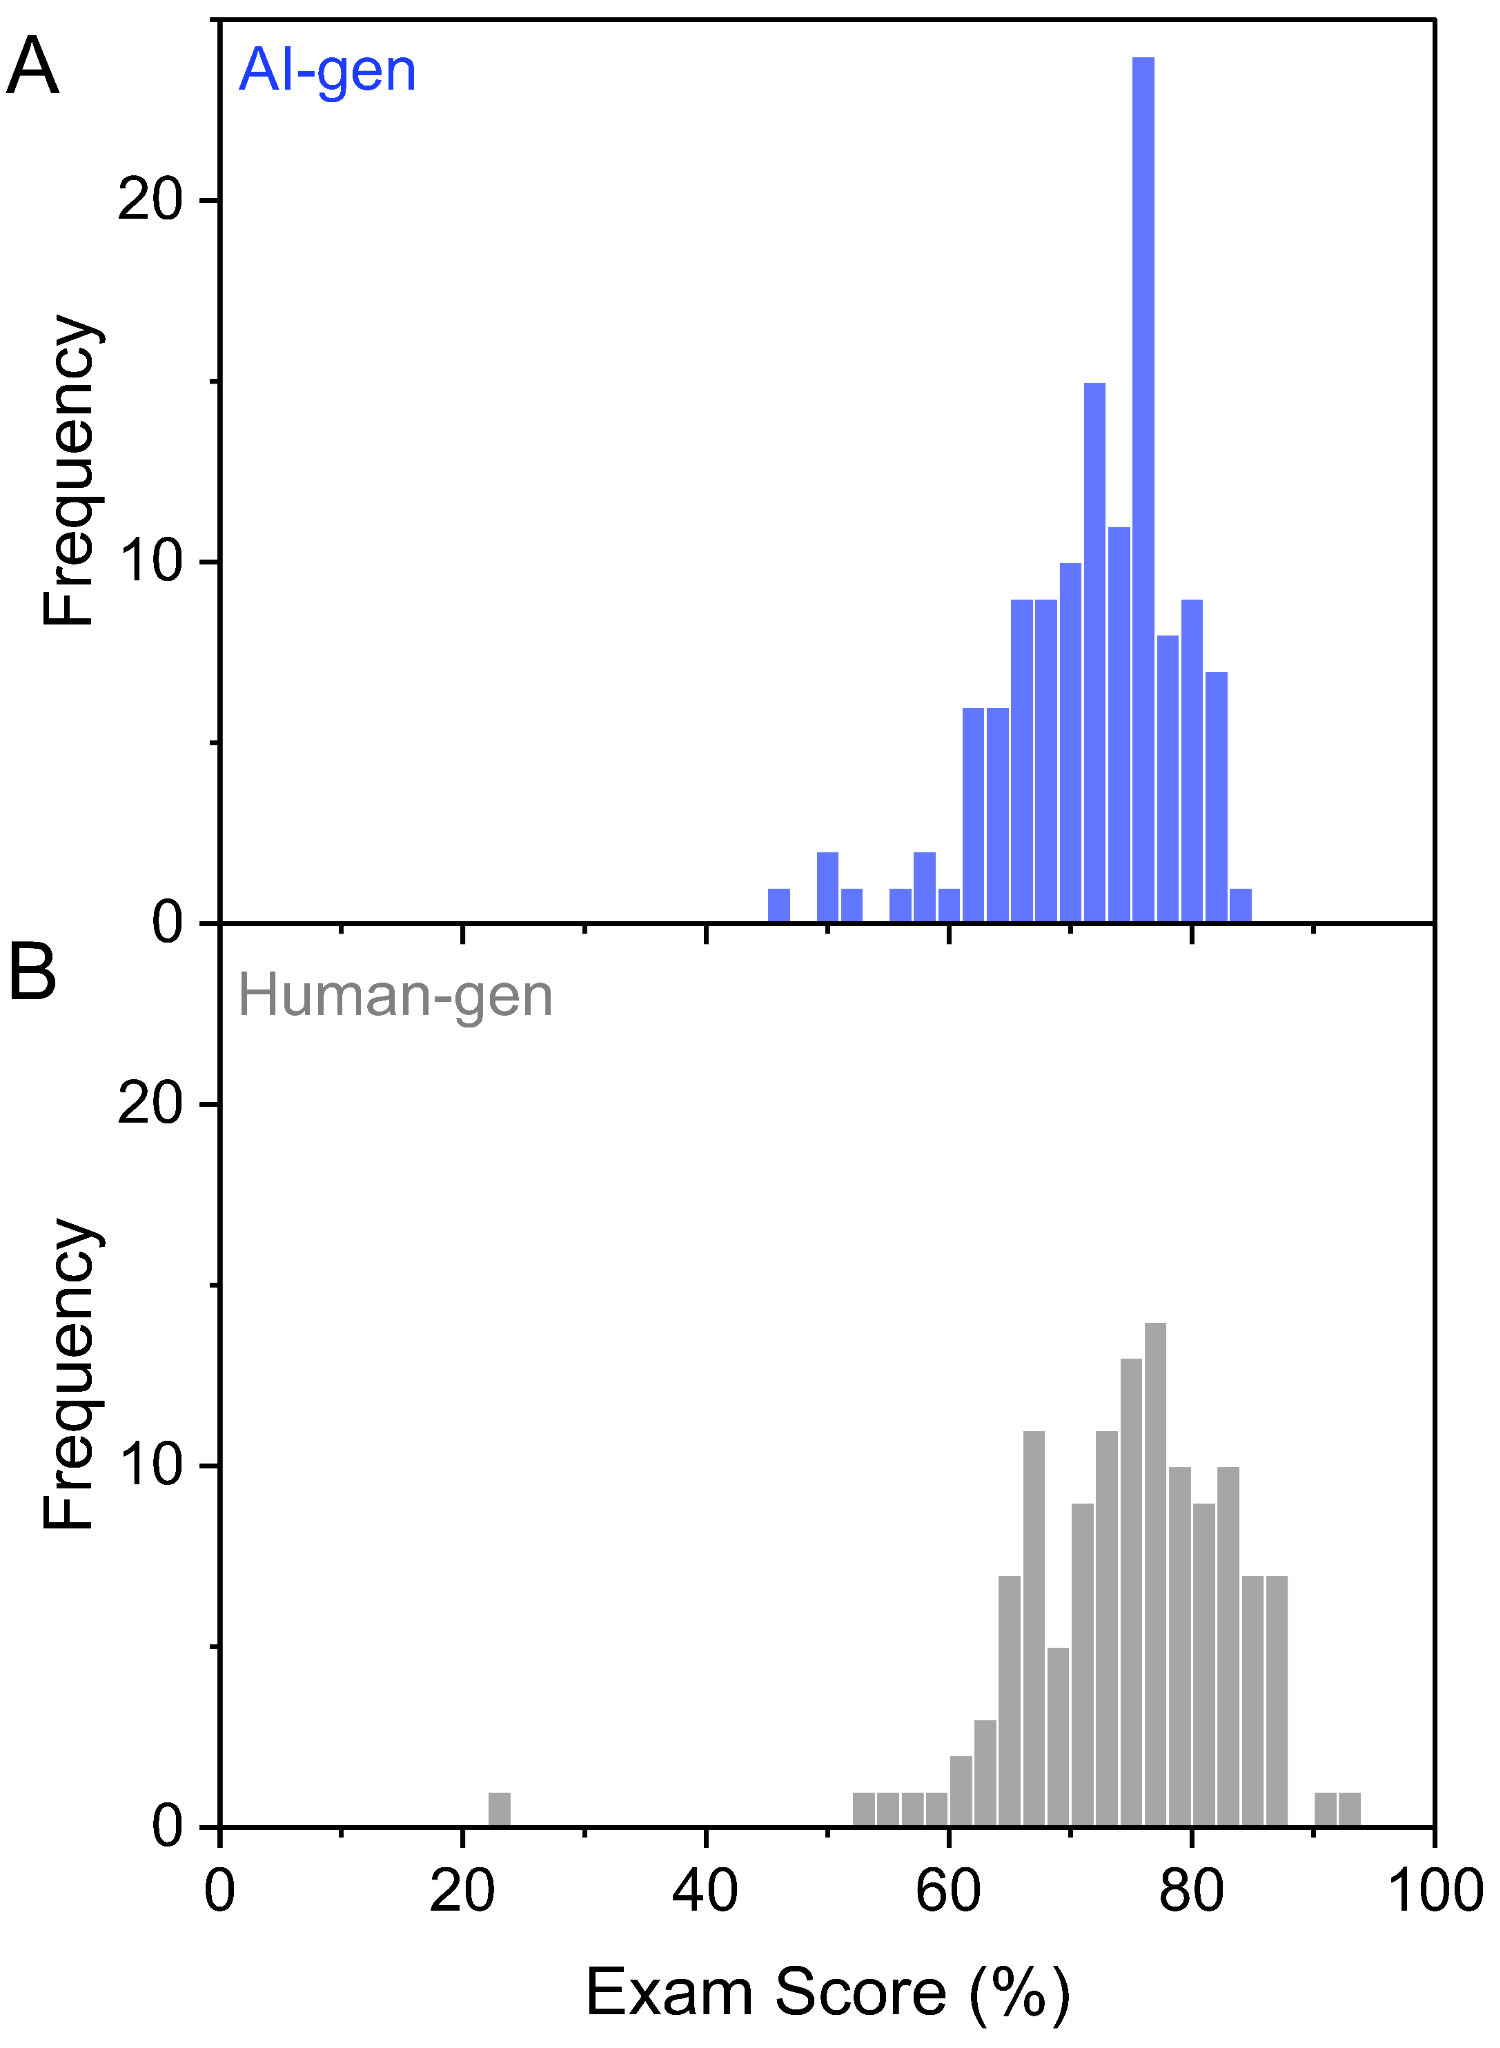


**Figure S5.** Histograms showing the distribution of student exam scores (% correct) for the (A) AI-gen and (B) human-gen examinations in the per-protocol population.

### Figure S6.1. Performance by undergraduate academic background in the PP population.


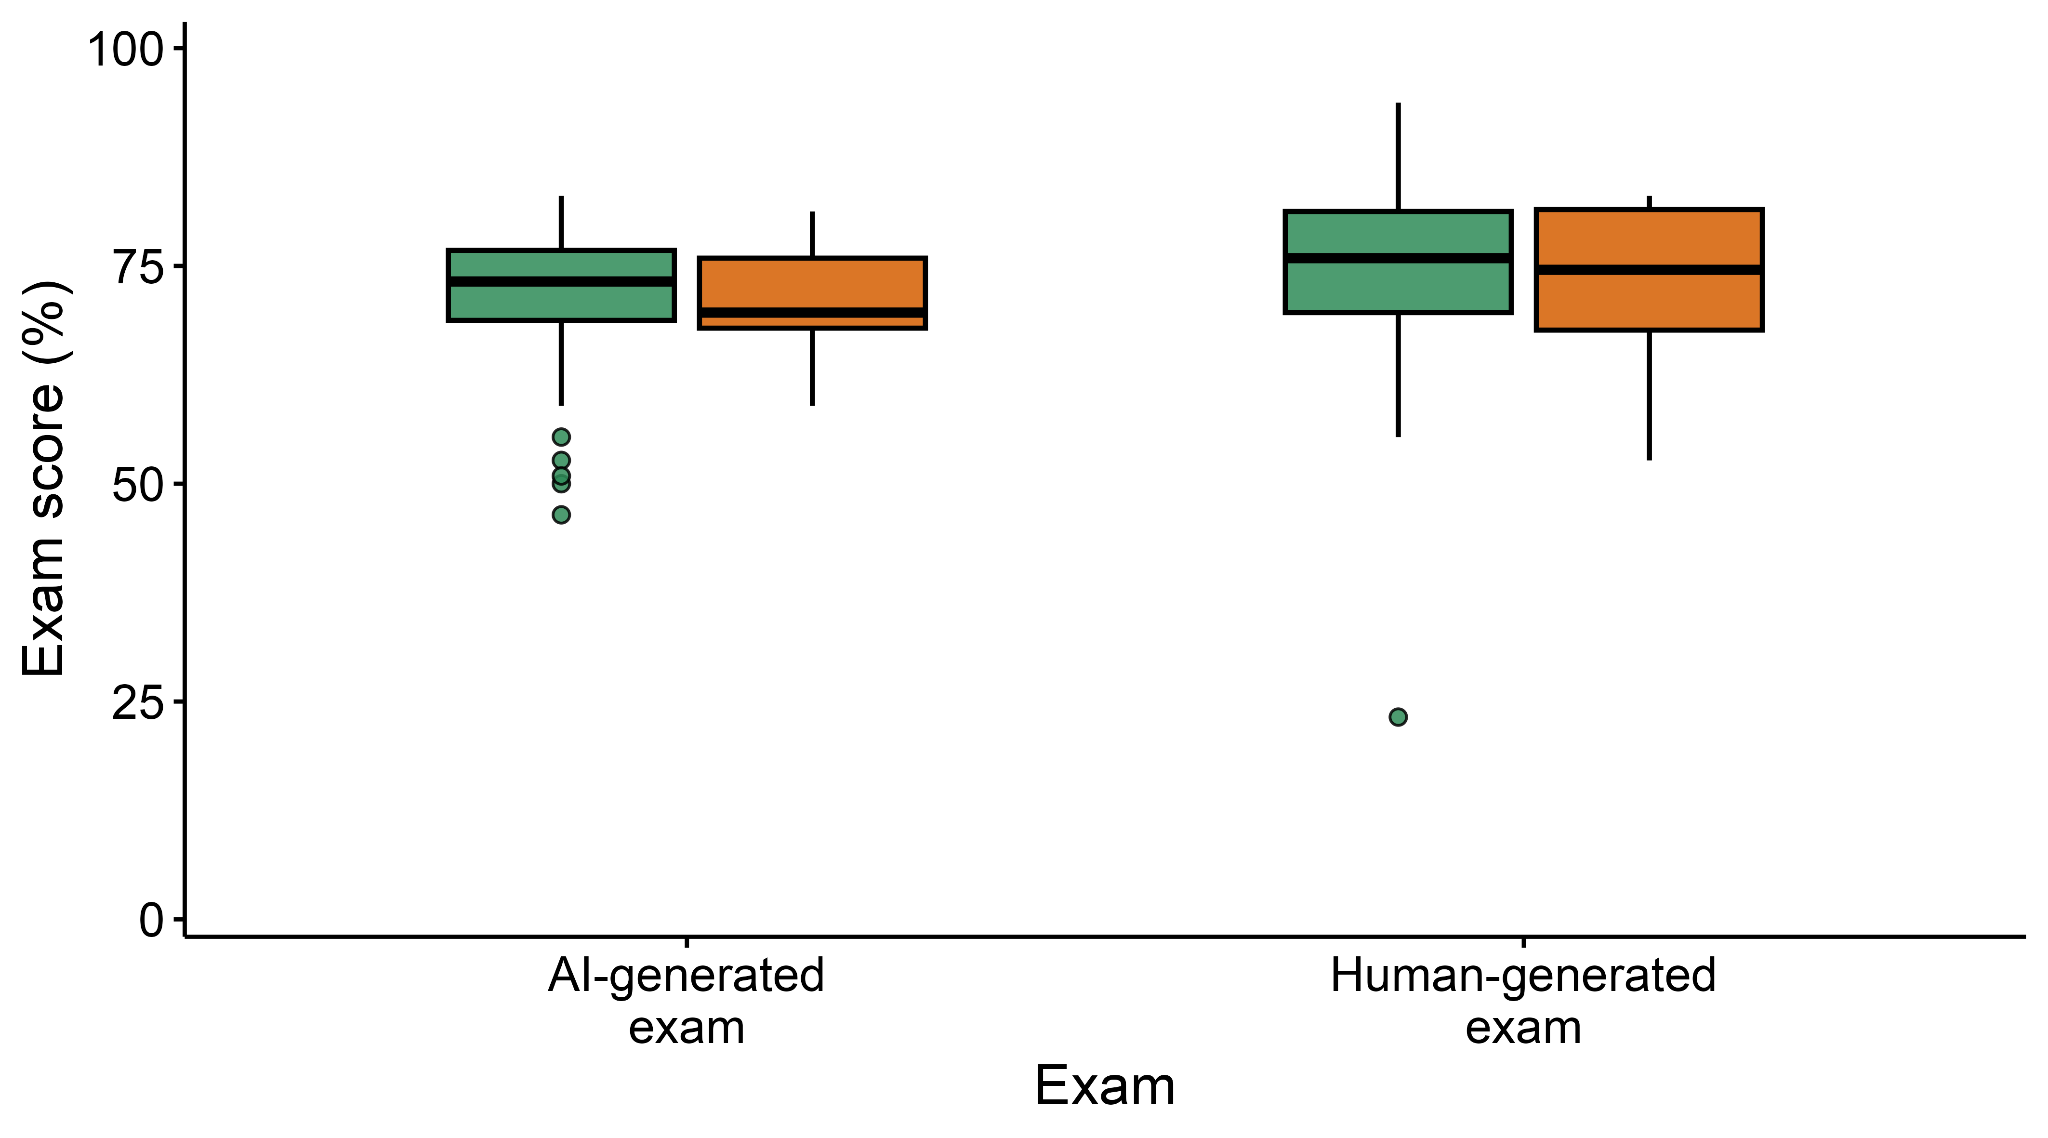


**Figure S6.1.** Boxplots of exam performance (%) in the per-protocol population stratified by undergraduate academic background. The x-axis shows exam type (left: AI-gen exam; right: human-gen exam). Within each exam, green boxes represent students with a medical/health sciences background and orange boxes represent students with a non-medical/non-health sciences background.

### Figure S6.2. Performance by undergraduate academic background in the ITT population.


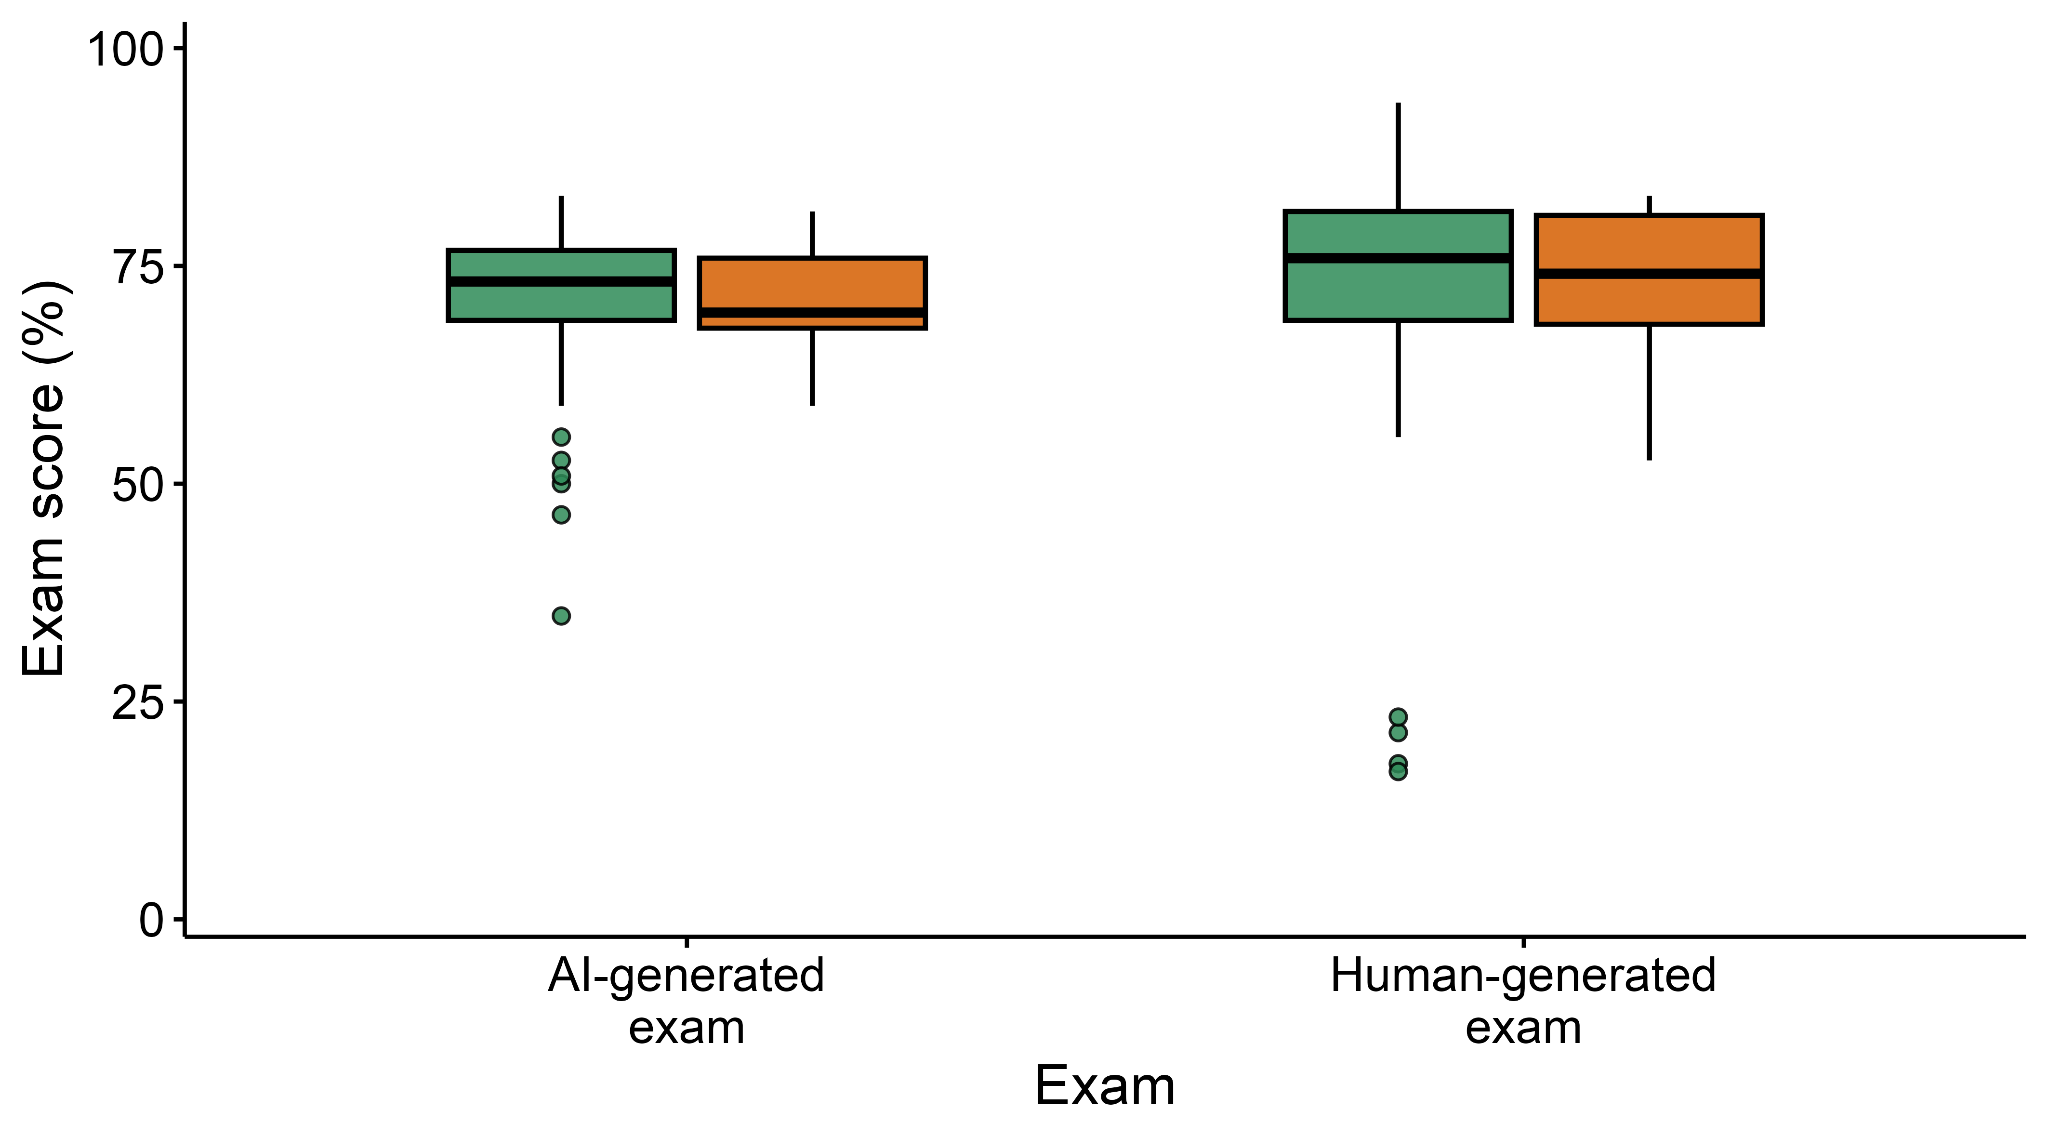


**Figure S6.2.** Boxplots of exam performance (%) in the ITT population stratified by undergraduate academic background. The x-axis shows exam type (left: AI-gen exam; right: human-gen exam). Within each exam, green boxes represent students with a medical/health sciences background and orange boxes represent students with a non-medical/non-health sciences background.

###

###

###

### Figure S7.1. Performance by curricular theme in the PP population.


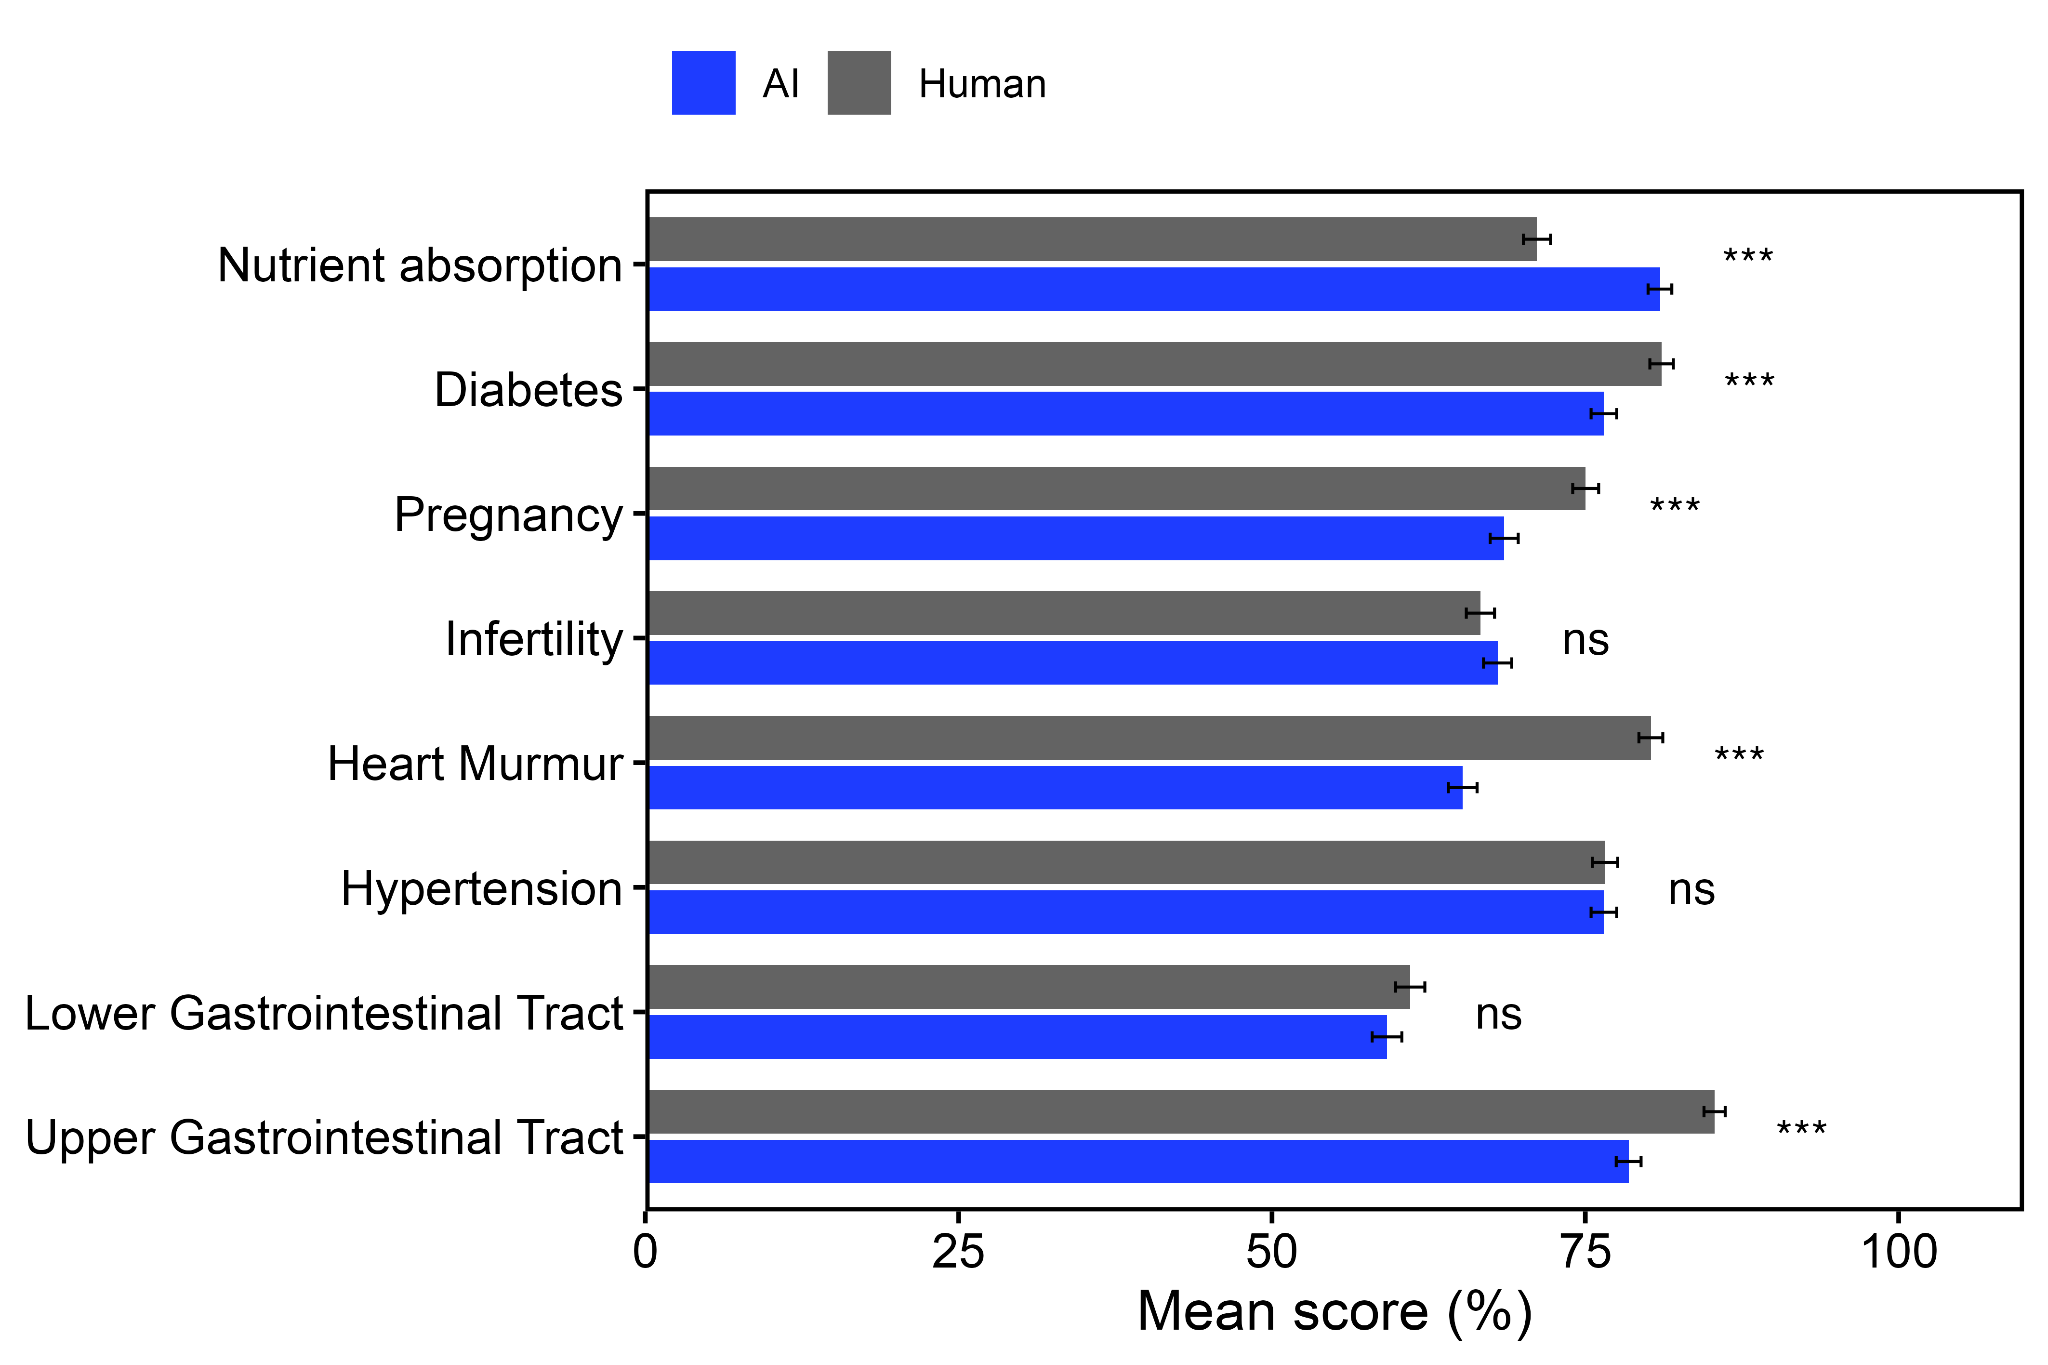


**Figure S7.1.** Bar plot showing mean score (%) ± standard error (SE) for each curricular theme, stratified by exam type (AI-gen versus human-gen). Bars represent the theme-level mean across all student–item observations within each theme, and error bars indicate ±1 SE. Significance labels beside each theme denote the raw p-value from independent-samples t-tests comparing AI- versus human-gen items within that theme.

### Figure S7.2. Performance by curricular theme in the ITT population.


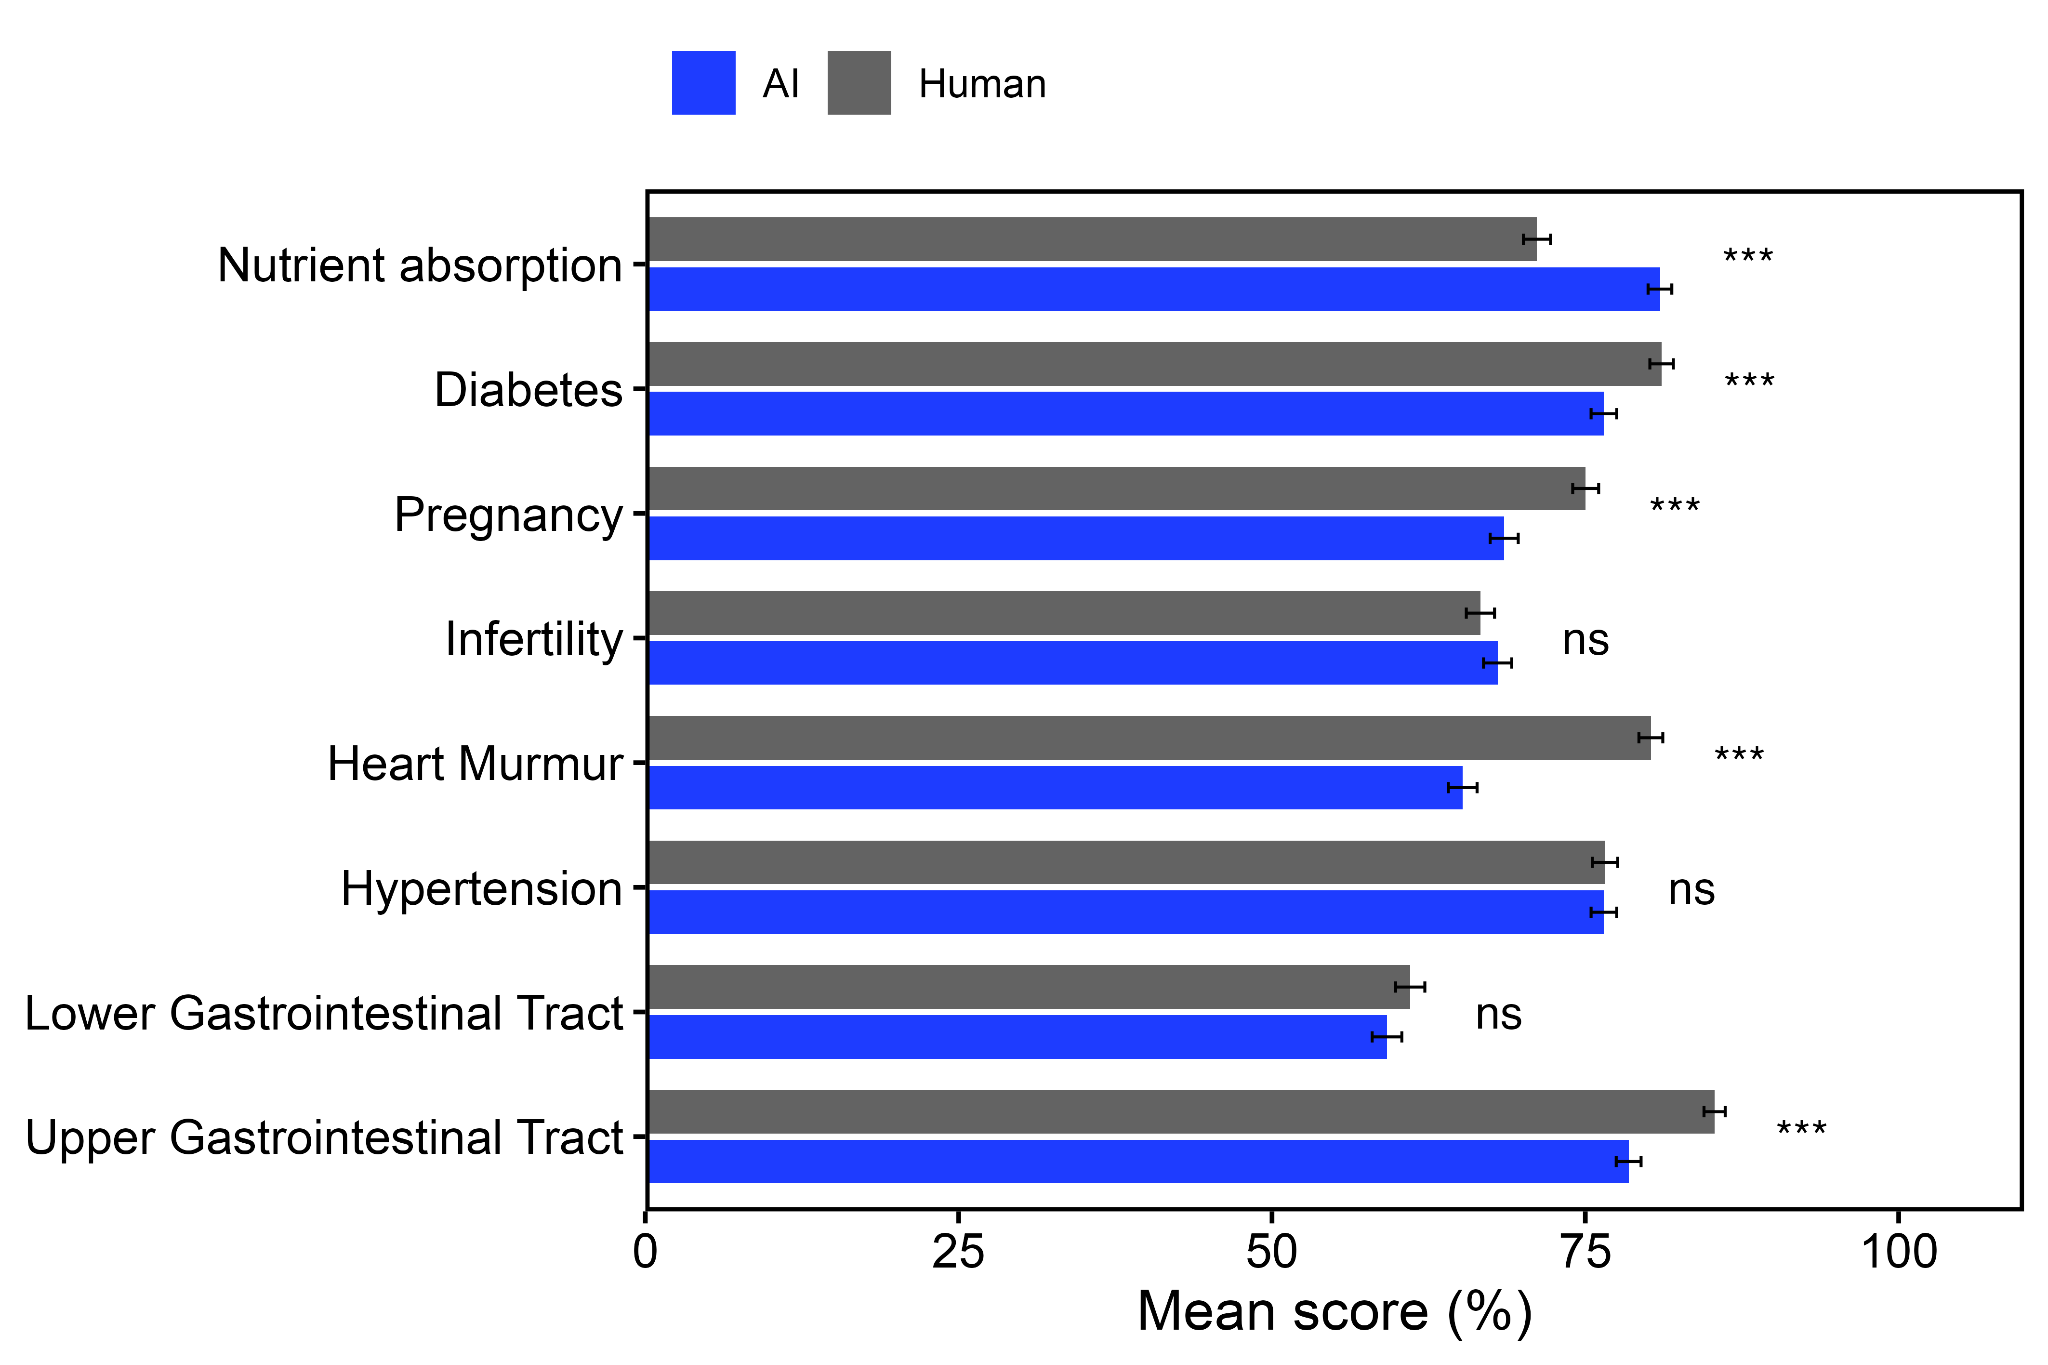


**Figure S7.2** Bar plot showing mean score (%) ± standard error (SE) for each curricular theme, stratified by exam type (AI- versus human-gen). Bars represent the theme-level mean across all student–item observations within each theme, and error bars indicate ±1 SE. Significance labels beside each theme denote the *p-*value from independent-samples t-tests comparing AI-gen versus human-gen items within that theme.

###

### Figure S8.1. Performance by gender in the PP population.


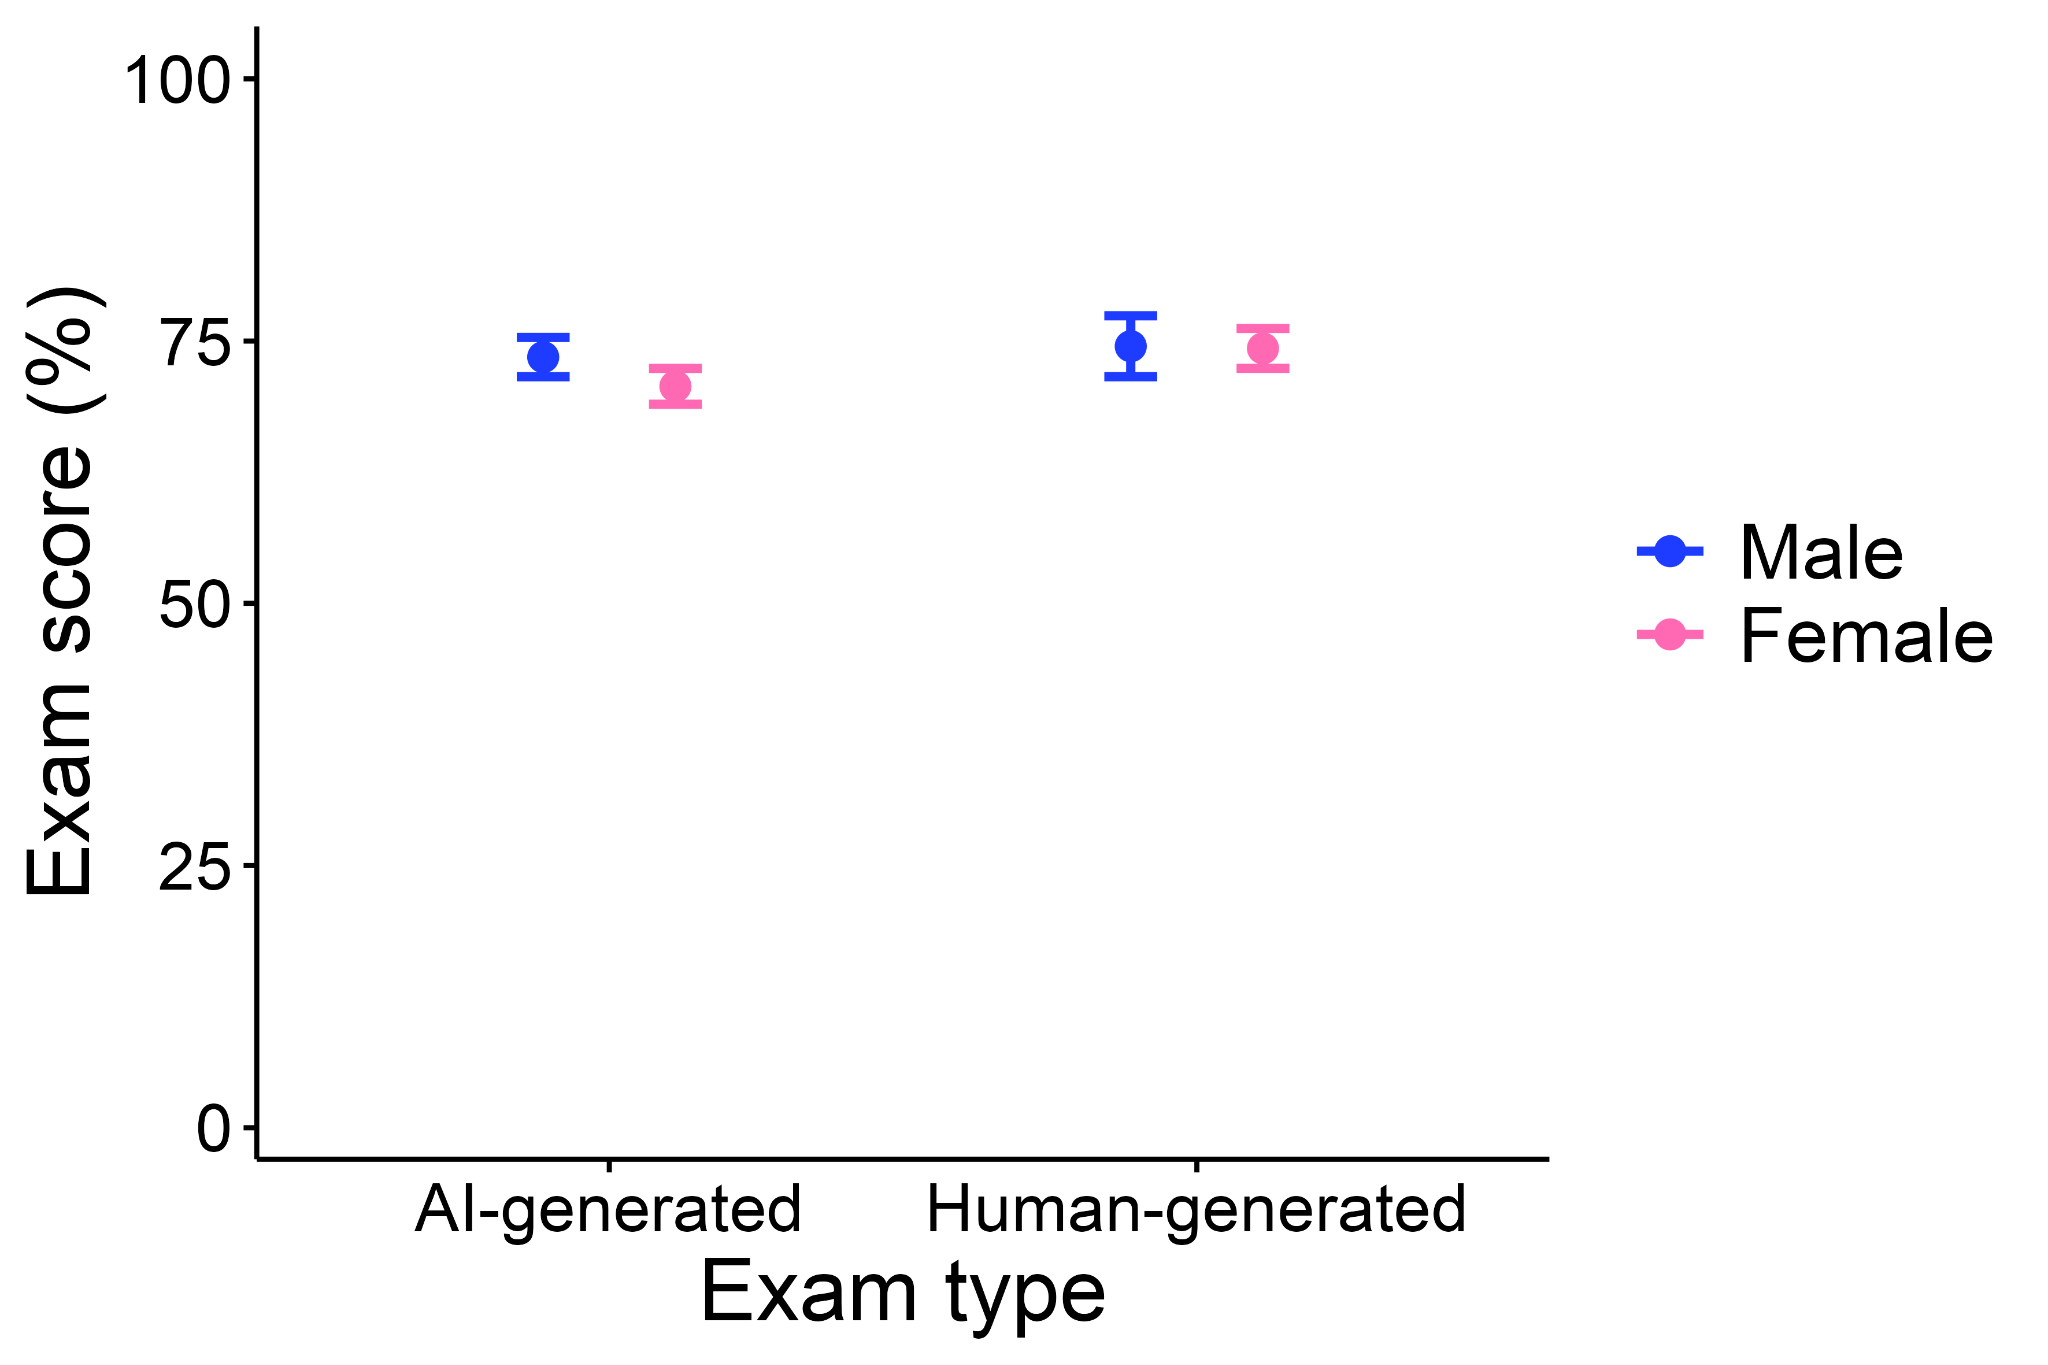


**Figure S8.1.** Mean exam scores (±95% confidence intervals) are shown for male (blue) and female (pink) students in the AI- and human-gen examinations within the per-protocol (PP) population. Points represent group means, and error bars represent 95% confidence intervals.

### Figure S8.2. Performance by gender in the ITT population.

##
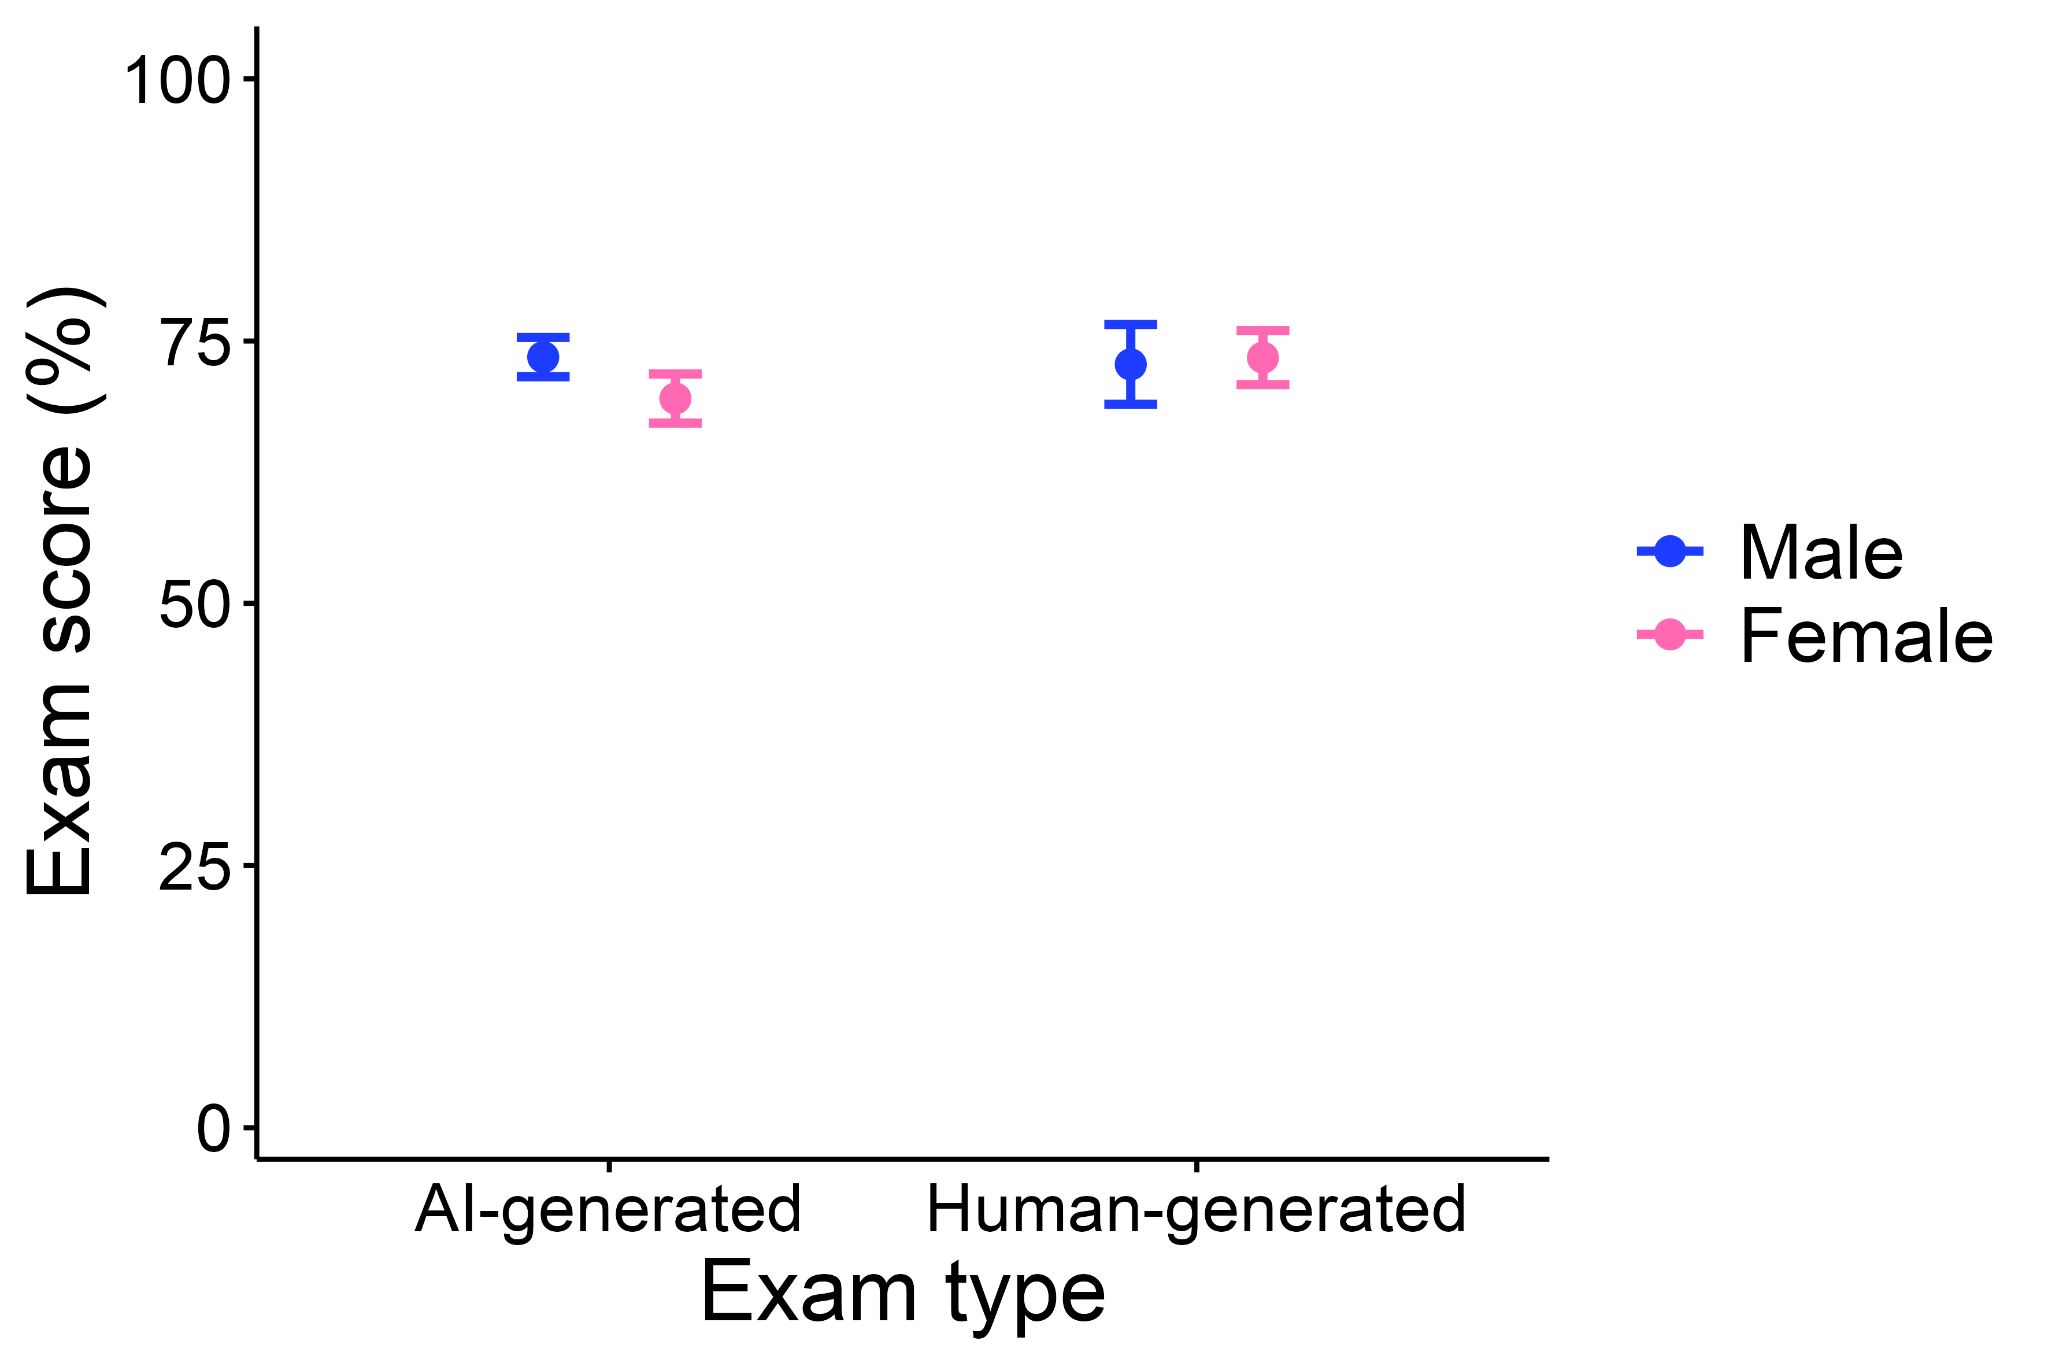


**Figure S8.2.** Mean exam scores (±95% confidence intervals) are shown for male (blue) and female (pink) students in the AI-gen and human-gen exams within the intention-to-treat (ITT) population. Points represent group means, and error bars represent 95% confidence intervals.

### Figure S9. Comparison of PP and ITT DI distributions.


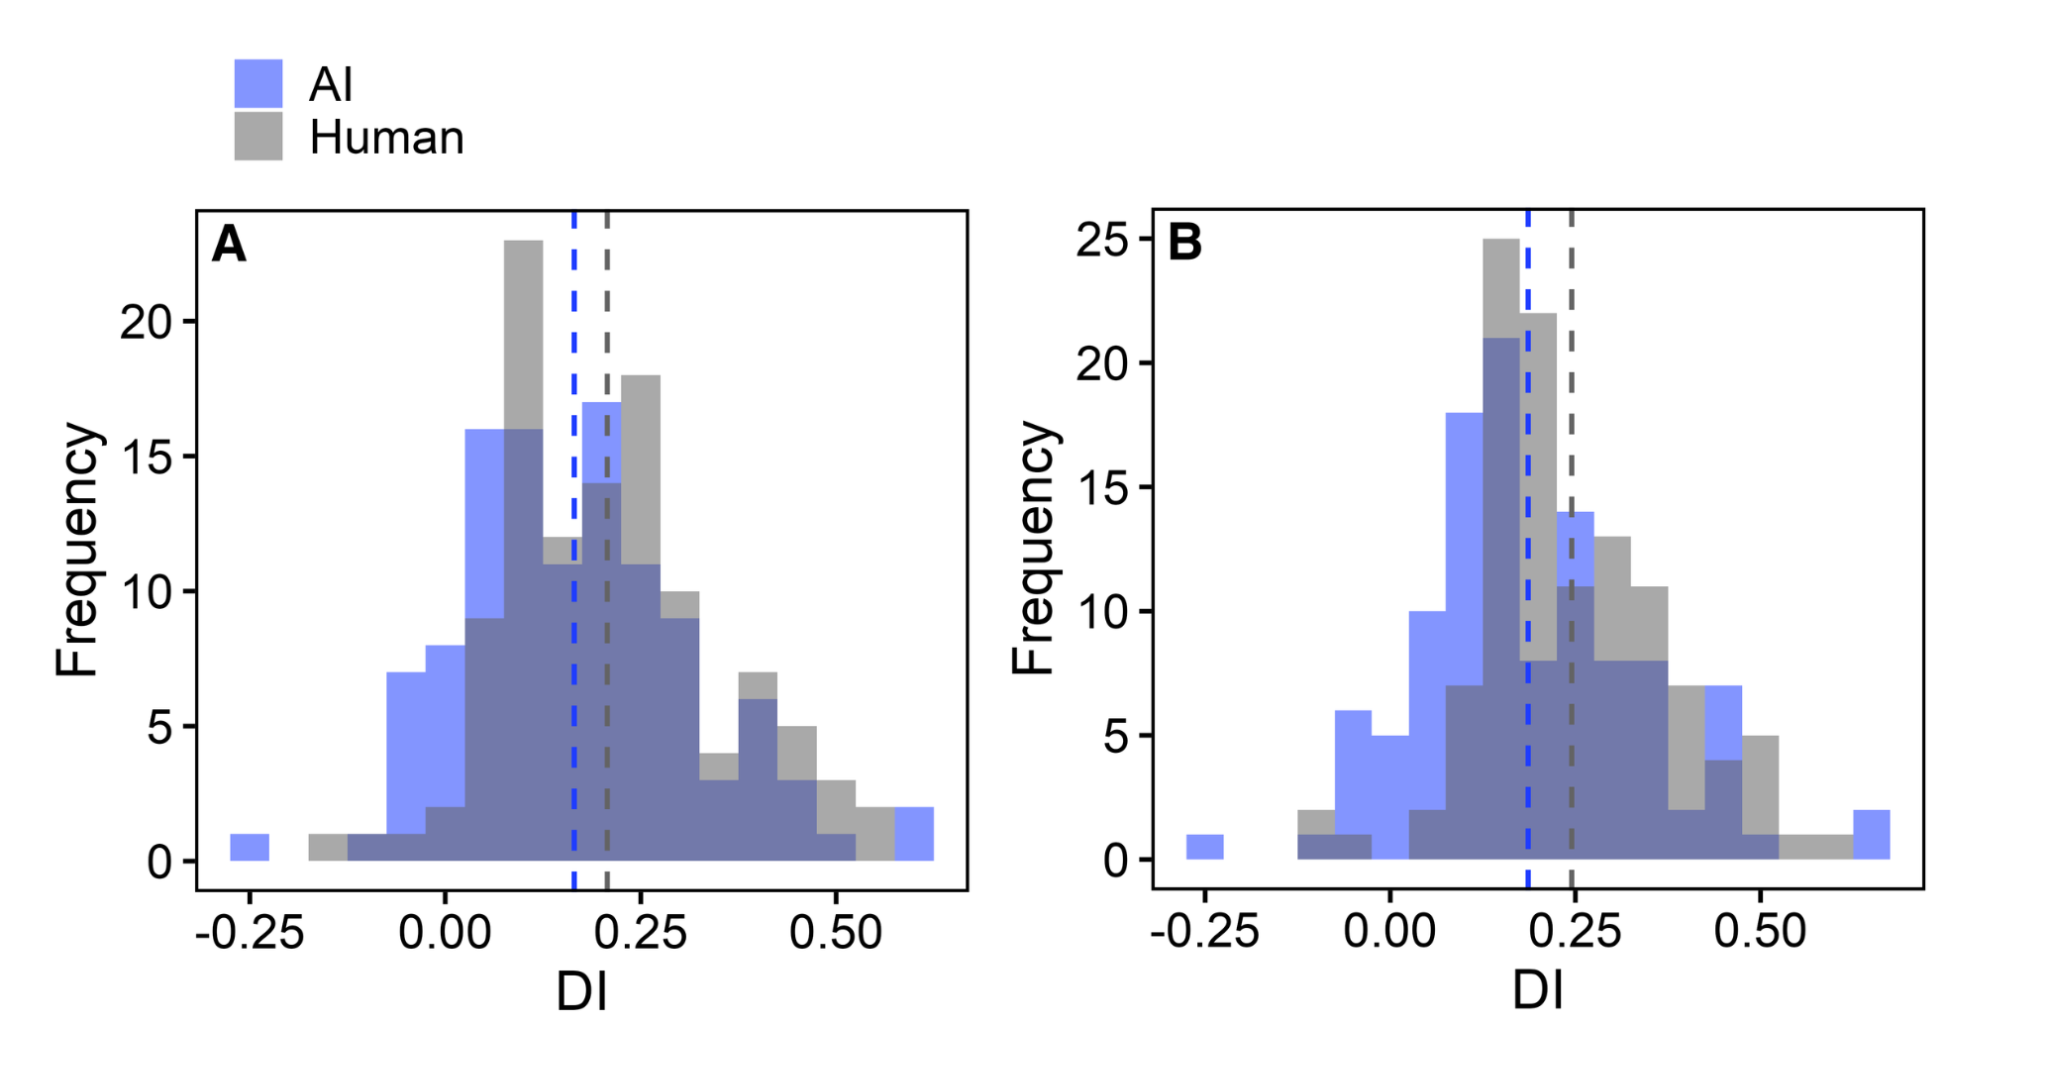


**Figure S9.** Comparison of the DI distributions for AI-gen (blue) and Human-gen (grey) MCQs in the (A) PP and (B) ITT analyses. In both the PP and ITT analyses, the distributions were indistinguishable by the Wilcoxon rank-sum test. Dashed vertical lines represent group DI means.

### Figure S10. Comparison of DI for PP and ITT populations.


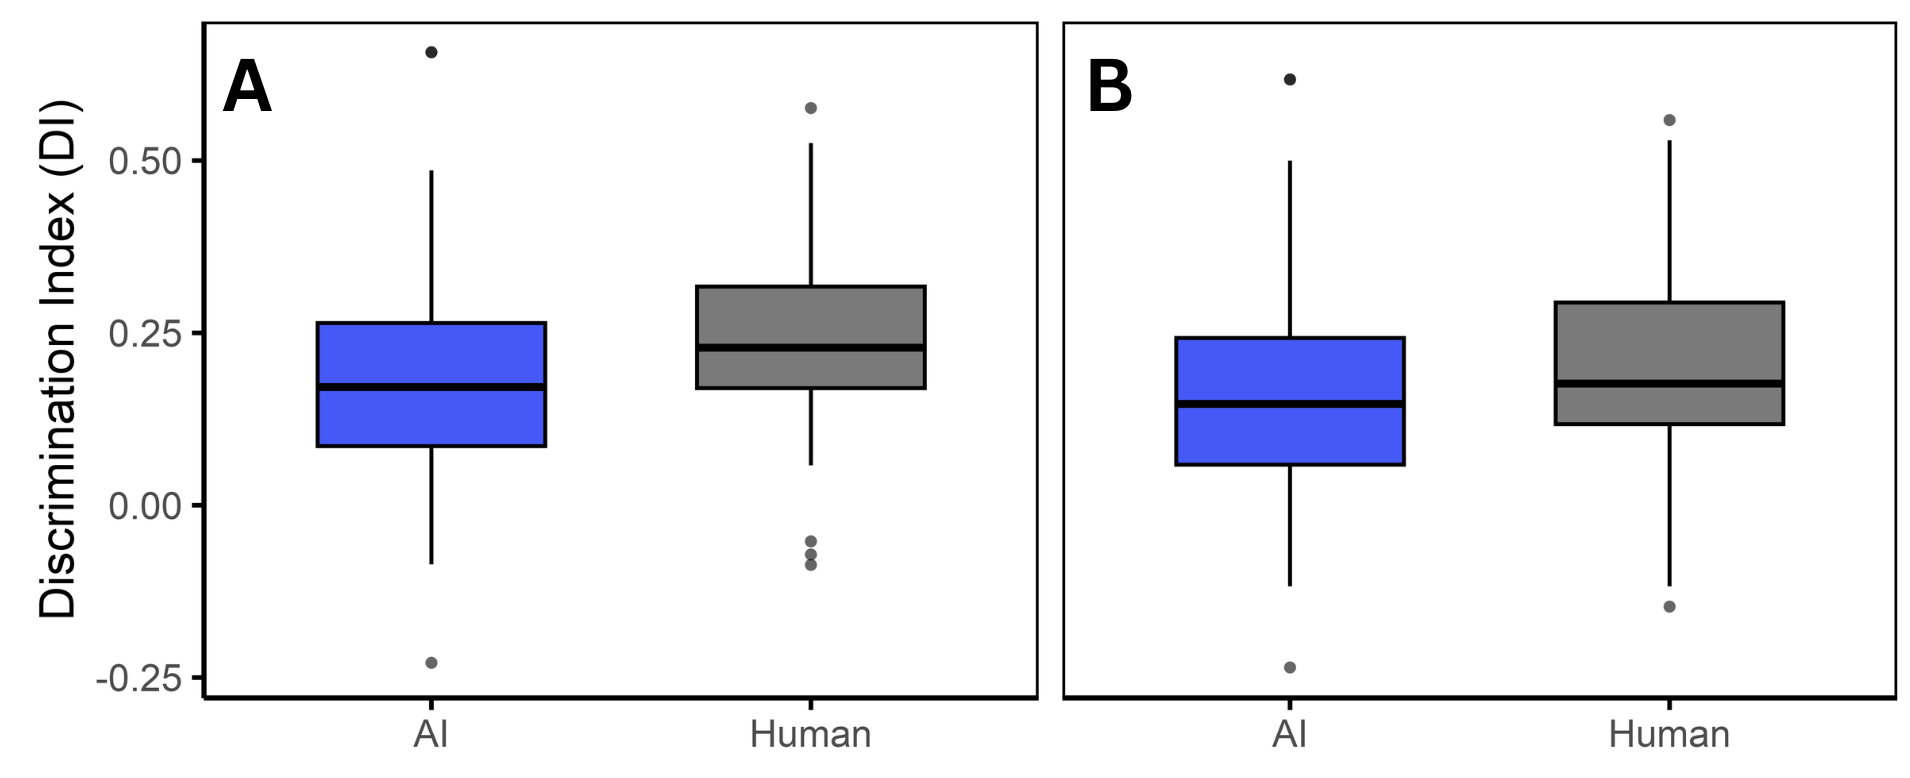


**Figure S10.** Boxplots comparing the DI values of the AI- and Human-gen exams in the (A) ITT and (B) PP analyses. For each boxplot, the center line represents the median, the box limits indicate the interquartile range (IQR), and whiskers extend to 1.5 X IQR. Data points lying outside this range are plotted individually.

###

### Figure S11. Acceptability metrics for PP population.


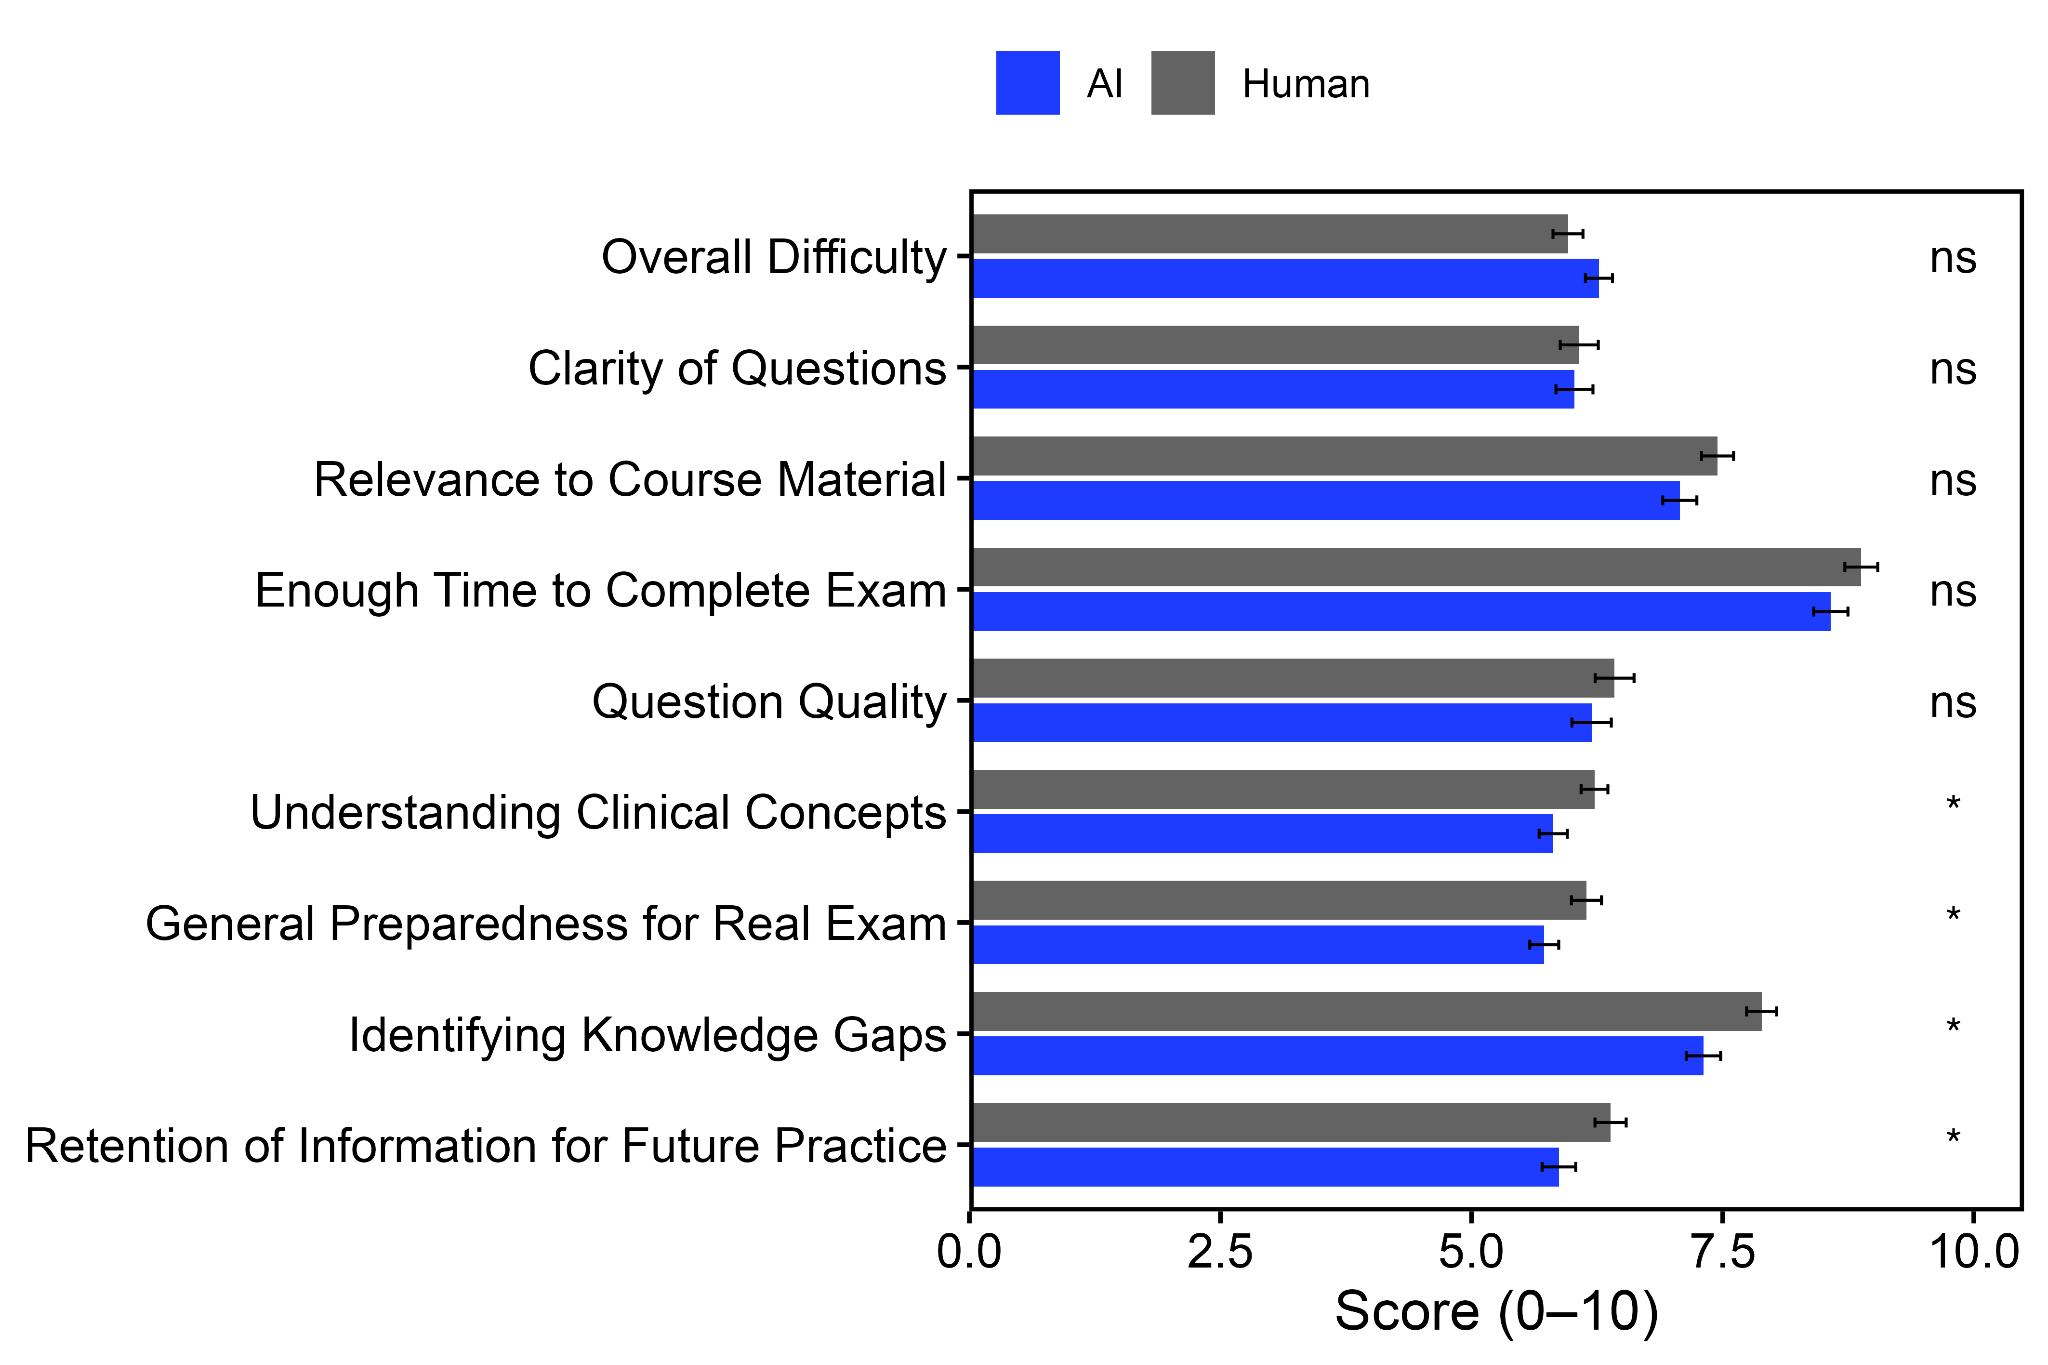


**Figure S11.** Student-reported perceptions of AI- and Human-gen exams in the PP population. Bars represent mean scores on a 10-point Likert scale, with error bars indicating standard error. Statistical comparisons were conducted using Welch’s t-test; “*” denote p < 0.05 and “ns” indicates non-significance (p ≥ 0.05).

##

## 6. Sample Paired AI-Gen and Human-Gen MCQs

A randomly selected subset of 30 paired AI-generated and human-generated multiple-choice questions (MCQs) is made publicly available in an open data repository. For each selected objective, the AI-generated and human-generated versions are presented side by side, together with the correct answer and item-level discrimination indices derived from the per-protocol (PP) analysis. These items are provided solely as illustrative research artefacts. They were not analyzed independently for psychometric inference beyond the full 112-item analyses reported in the main manuscript and are not validated for summative assessment.

The dataset is publicly available at Zenodo (DOI: [10.5281/zenodo.18284890](https://doi.org/10.5281/zenodo.18284890)).

##

## 7. Supplementary References

[1.](https://www.zotero.org/google-docs/?ViUwRH)  [Cohen J. Statistical power analysis for the behavioral sciences. 2nd ed. Hillsdale, N.J: L. Erlbaum Associates; 1988. 567 p.](https://www.zotero.org/google-docs/?ViUwRH)
